# Supplementary material
Source: PubMed Central journal article supplement (PMC3447104)
Supplement: NIHMS404147-supplement-1_si_001.pdf [file NIHMS404147-supplement-1_si_001.pdf]

## SUPPORTING INFORMATION

# Fluorescence Quenchers for Hydrazone and Oxime Orthogonal Bioconjugation

Pete Crisalli, Armando R. Hernandez and Eric T. Kool\*

*Department of Chemistry, Stanford University  
Stanford, CA 94305-5080 (USA)*

*\*e-mail: kool@stanford.edu*

### Table of Contents

|                                                                                    |     |
|------------------------------------------------------------------------------------|-----|
| Synthetic Schemes.....                                                             | S2  |
| Mass spectrometric and HPLC analysis of quencher-conjugated oligonucleotides... .. | S4  |
| Ground state complex formation studies .....                                       | S5  |
| Intracellular fluorescence quenching experiments.....                              | S7  |
| NMR spectra of synthetic intermediates.....                                        | S12 |

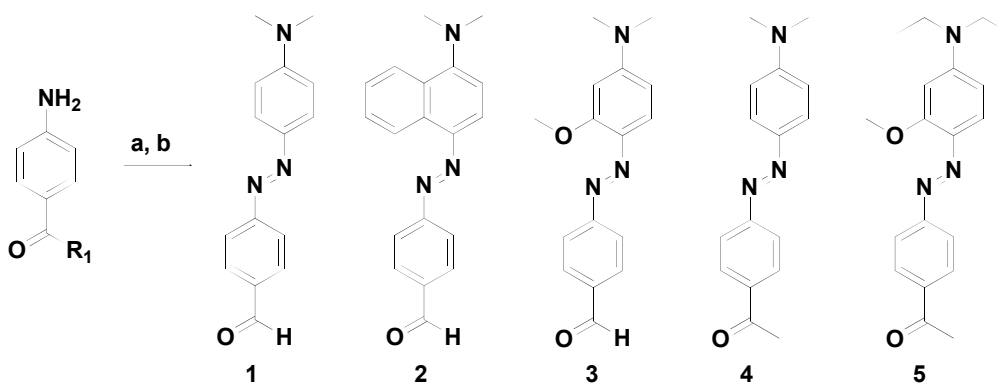

**Scheme S1:** Preparation of compounds **1 – 5**.  $\text{R}_1 = \text{H}$  (**1 – 3**) or  $\text{R}_1 = \text{CH}_3$  (**4 – 5**).  $\text{R}_2$  corresponds to the aniline used for each product. (a):  $\text{NaNO}_2, \text{HCl}, 0^\circ\text{C}$  (b) Aniline derivative,  $\text{NaOAc}$ .

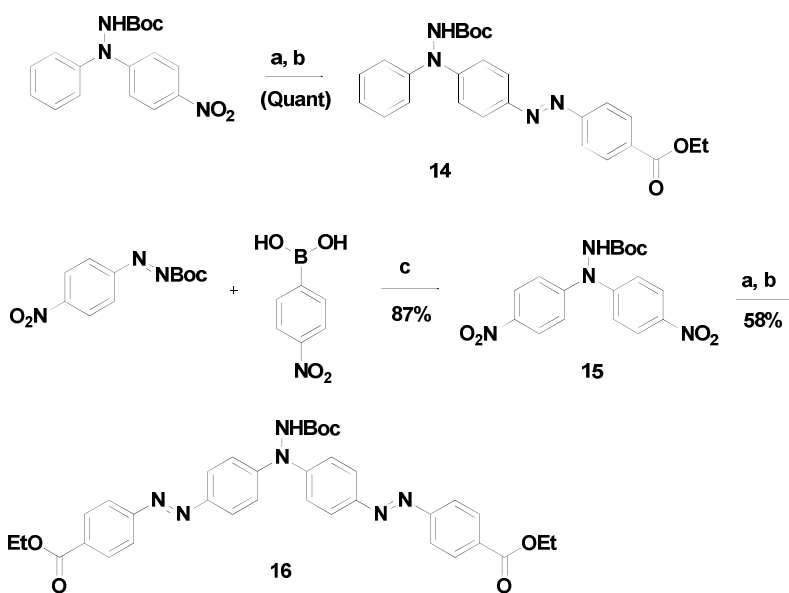

**Scheme S2:** Synthesis of boc-protected precursors for hydrazine-based quenchers. (a):  $\text{H}_2, \text{Pd/C}, \text{MeOH}$  (b): Ethyl 4-nitrosobenzoate,  $\text{AcOH}, \text{Toluene}$  (c):  $\text{Cu}(\text{OAc})_2 \cdot \text{H}_2\text{O}, \text{MeOH}$ .

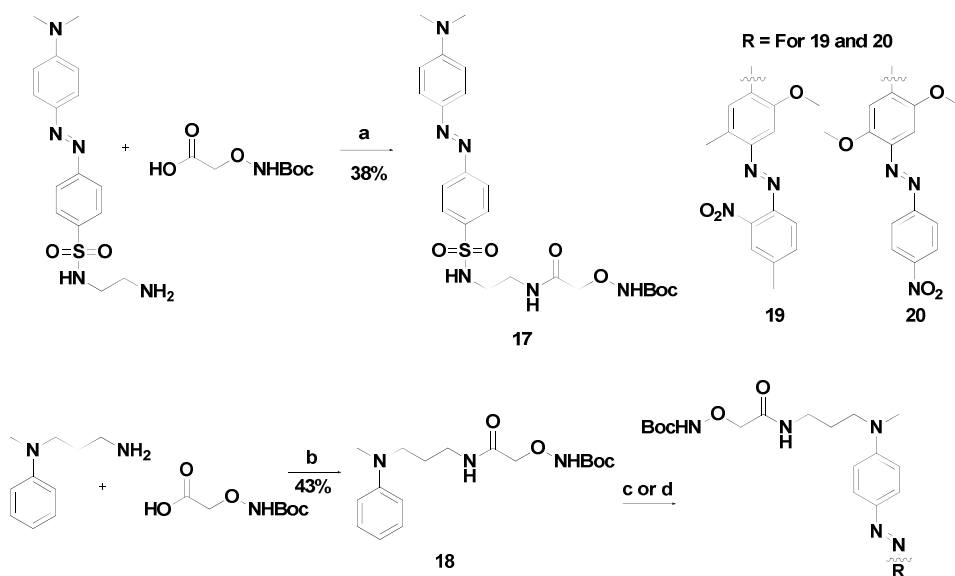

**Scheme S3:** Synthesis of boc-protected precursors for oxime-based quenchers. (a): EDCl, HOAt, Et<sub>3</sub>N, CH<sub>2</sub>Cl<sub>2</sub> (b): EDCl, Et<sub>3</sub>N, CH<sub>2</sub>Cl<sub>2</sub> (c): THF, MeOH, Fast Corinth V (13%) (d): THF, MeOH, Fast Black K (53%)

**Table S1:** MALDI-TOF and analytical HPLC data for oligodeoxynucleotides in this study.

| DNA conjugate | MALDI Calc | MALDI Obs | Purity (HPLC) |
|---------------|------------|-----------|---------------|
| Dabcyl        | 6541.2     | 6541.9    | 99.6%         |
| 1 oxime       | 6485.2     | 6486.7    | 99.5%         |
| 1 hydrazone   | 6554.2     | 6554.6    | 97.2%         |
| 2 oxime       | 6535.2     | 6536.1    | 99.7%         |
| 3 oxime       | 6515.2     | 6513.9    | 99.8%         |
| 3 hydrazone   | 6584.3     | 6581.9    | 98.2%         |
| 4 oxime       | 6499.2     | 6500.4    | 99.0%         |
| 5 oxime       | 6557.2     | 6558.2    | 97.1%         |
| Bis (1) oxime | 6765.3     | 6765.6    | 96.1%         |
| Bis (2) oxime | 6865.3     | 6870.5    | 99.8%         |
| Bis (3) oxime | 6825.3     | 6824.8    | 99.6%         |
| 10 hydrazone  | 6735.2     | 6734.6    | 99.5%         |
| 7 hydrazone   | 6690.2     | 6691.5    | 99.8%         |
| 8a hydrazone  | 6748.2     | 6752.7    | 99.8%         |
| 8b hydrazone  | 6747.3     | 6751.0    | 99.8%         |
| 9a hydrazone  | 6896.3     | 6899.3    | 99.7%         |
| 9b hydrazone  | 6894.3     | 6893.2    | 99.9%         |
| 6 hydrazone   | 6569.2     | 6572.3    | 98.8%         |
| Fluorescein   | 6678.2     | 6677.7    | 98.9%         |
| Fam 6 Beacon  | 8877.6     | 8878.8    | 99.6%         |
| Fam 7 Beacon  | 8833.6     | 8834.2    | 99.8%         |
| Aldehyde DNA  | 6434.1     | 6433.3    | 99.1%         |
| BHQ2          | 6651.2     | 6652.1    | 99.9%         |
| 13 oxime      | 6966.3     | 6972.4    | 99.3%         |
| 12 oxime      | 6964.4     | 6964.9    | 98.7%         |
| 11 oxime      | 6836.3     | 6836.4    | 99.1%         |

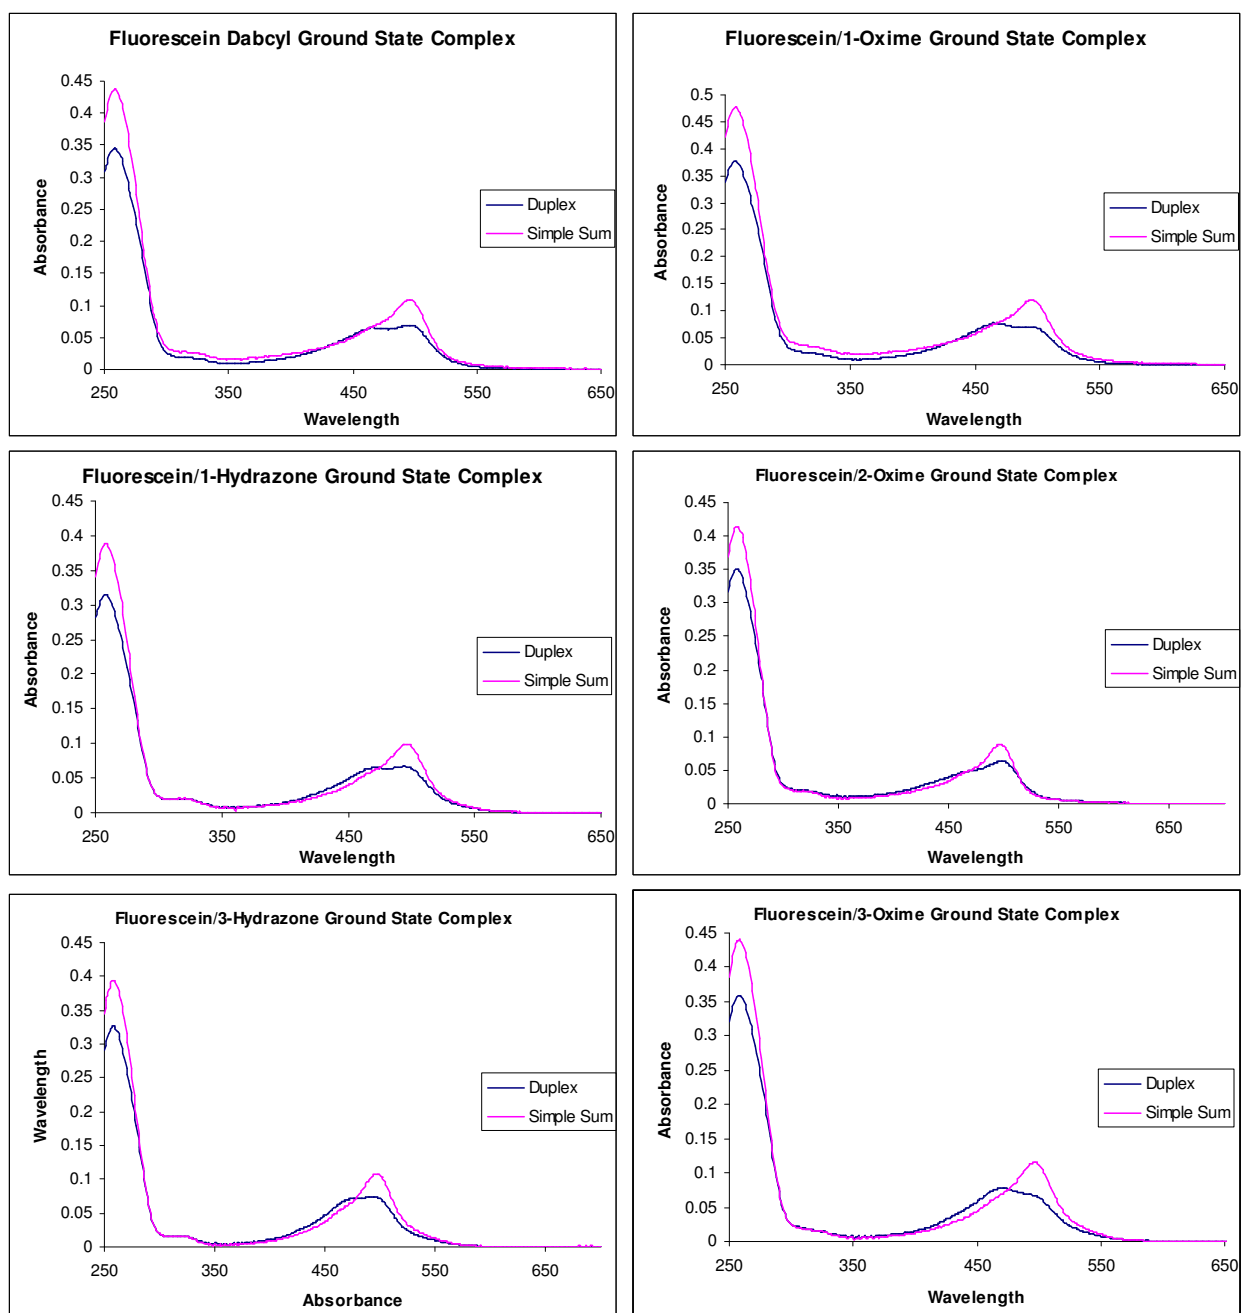

**Figure S1:** Spectral evidence of ground-state complex formation between quencher-conjugated 20mers and 3'-fluorescein 20mer. Duplexes were formed by annealing a solution 1  $\mu\text{M}$  in each strand in hybridization buffer at 70  $^{\circ}\text{C}$  for 5 min, then allowing to cool to room temperature over 30 min. The simple sum was created by adding data for solutions containing only 1  $\mu\text{M}$  of either quencher- or fluorophore-labeled oligonucleotide.

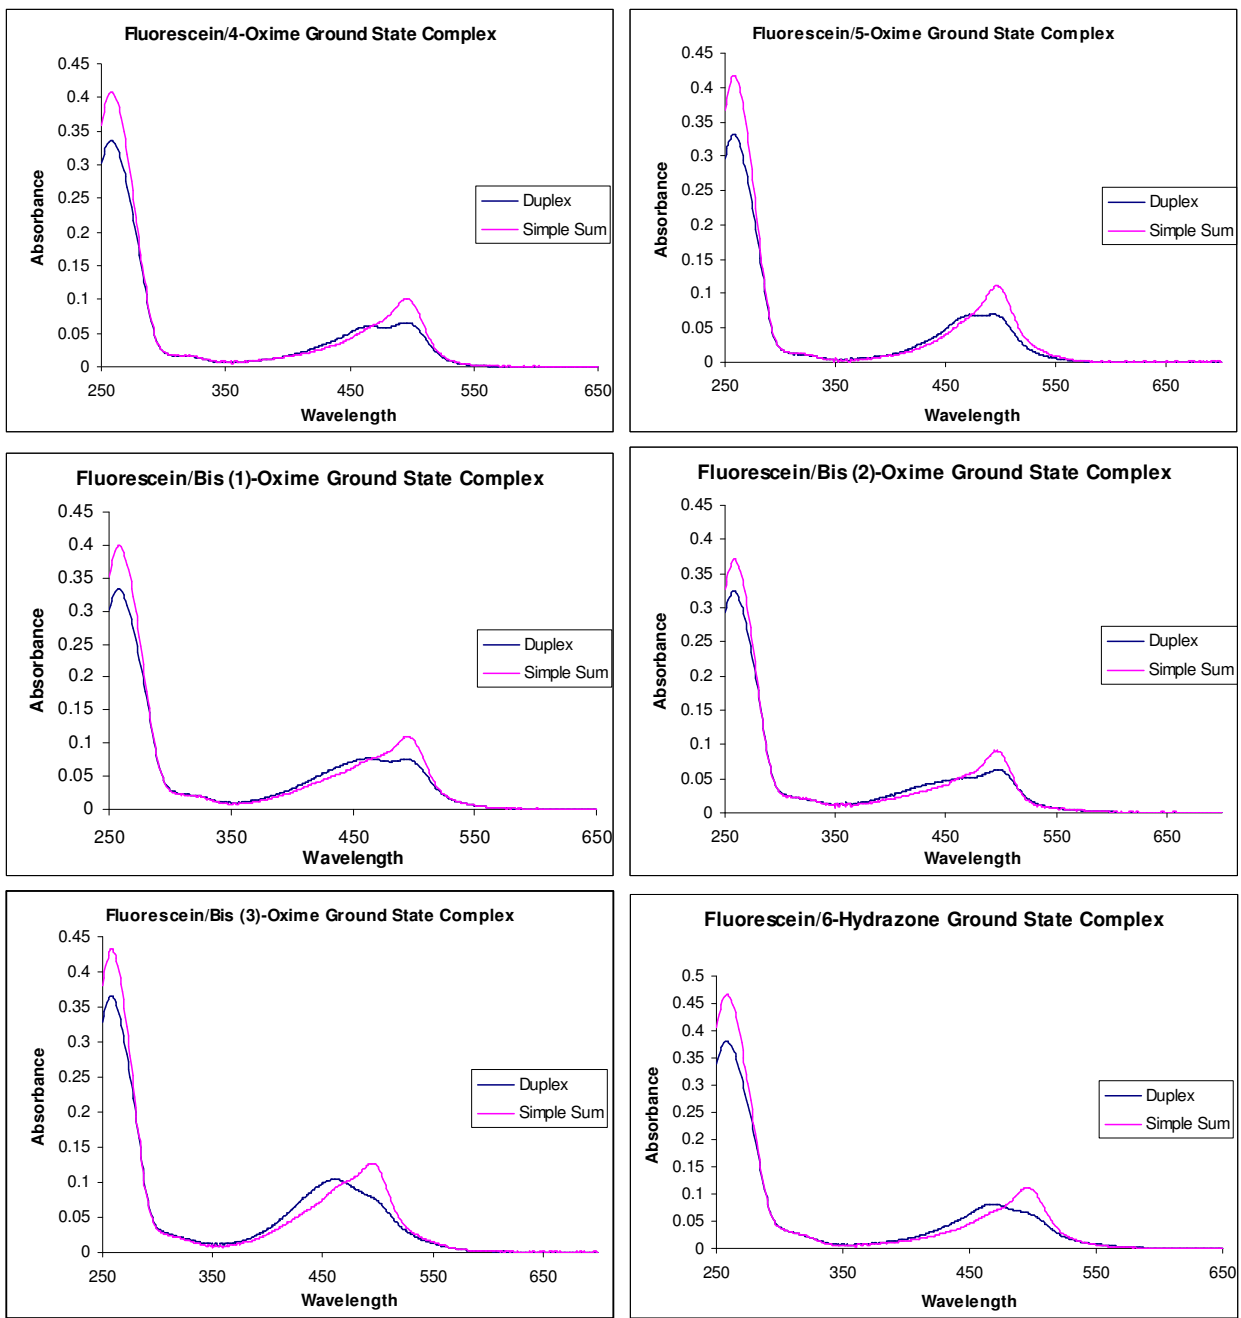

Figure S1 (continued)

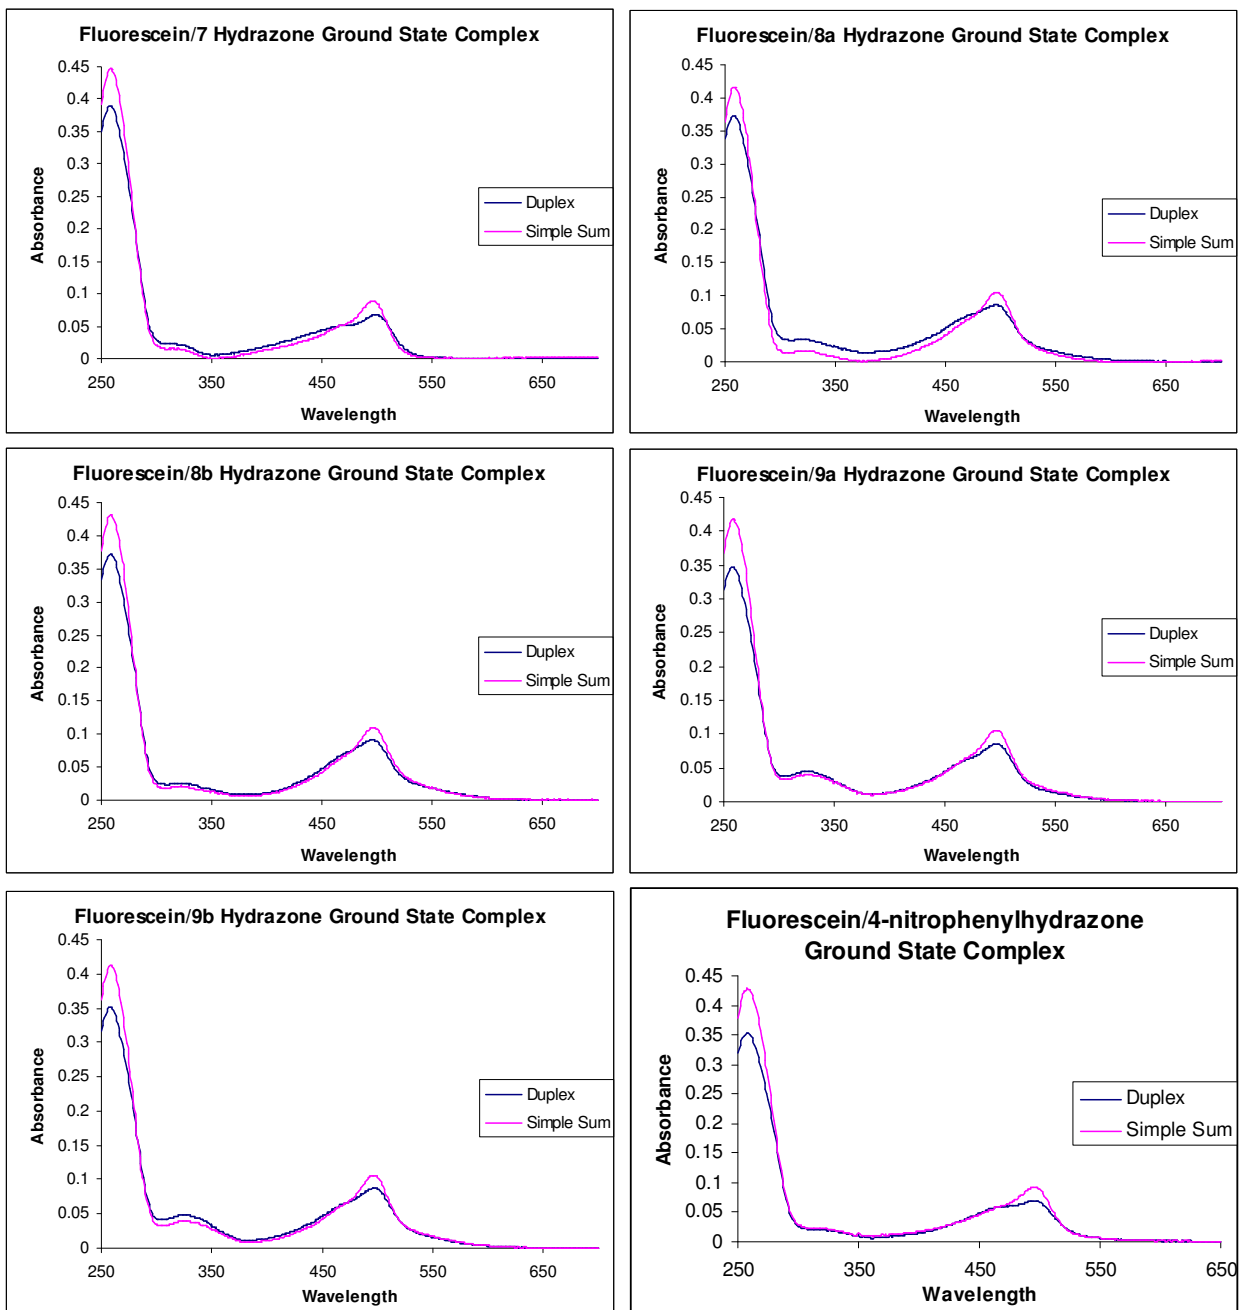

Figure S1 (continued)

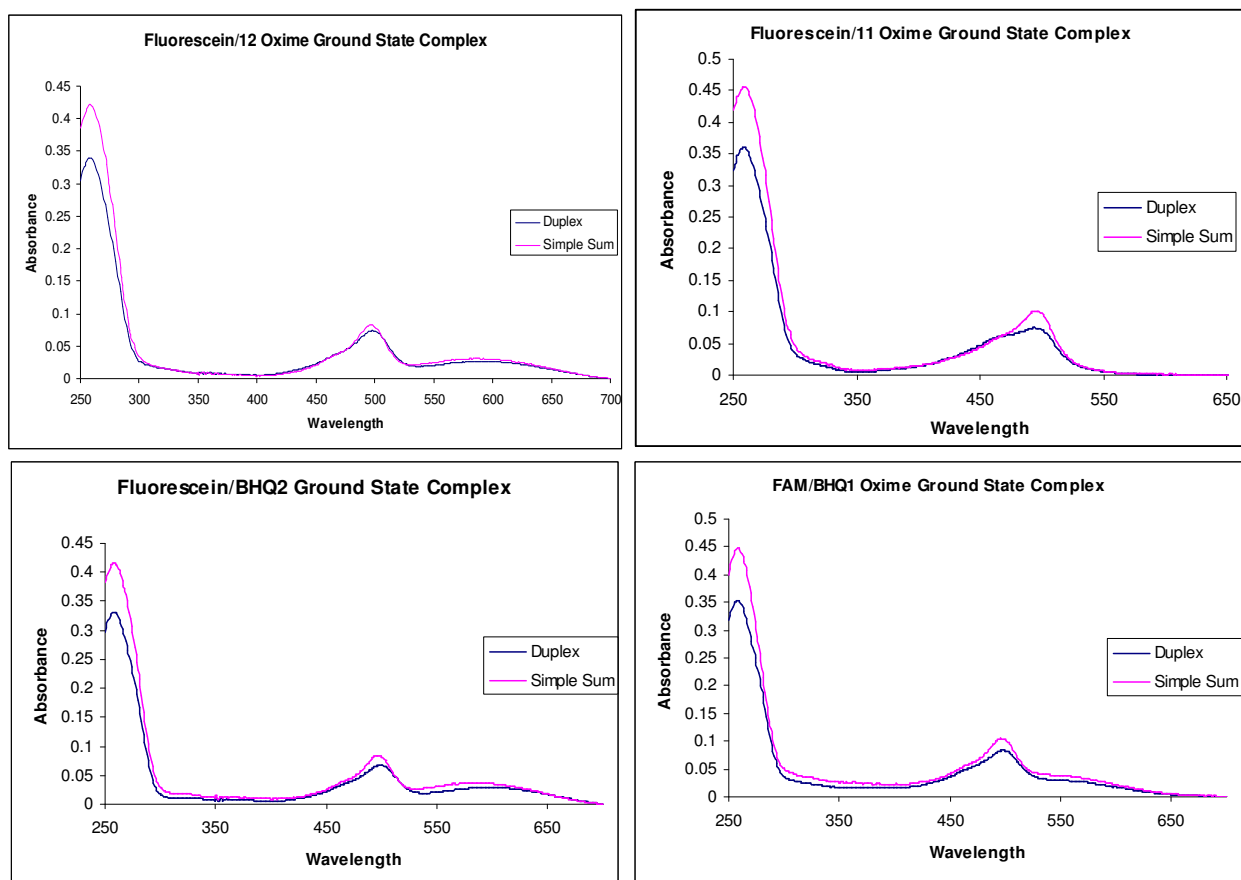

**Figure S1** (continued)



Fluorophore Only

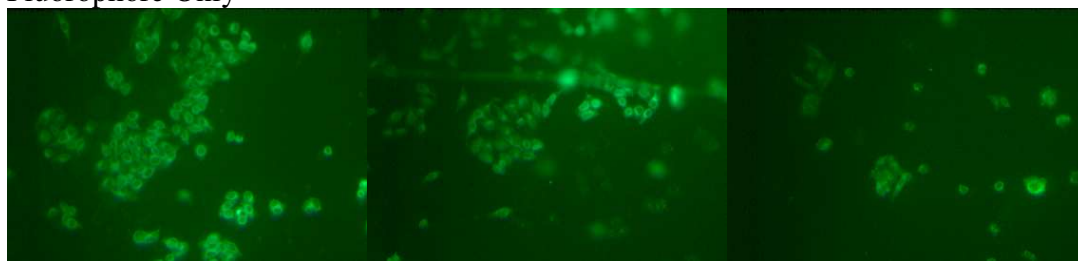

1 hr

2 hr

3 hr

100  $\mu$ M unfunctionalized dabcyI control, 10 mM Aniline

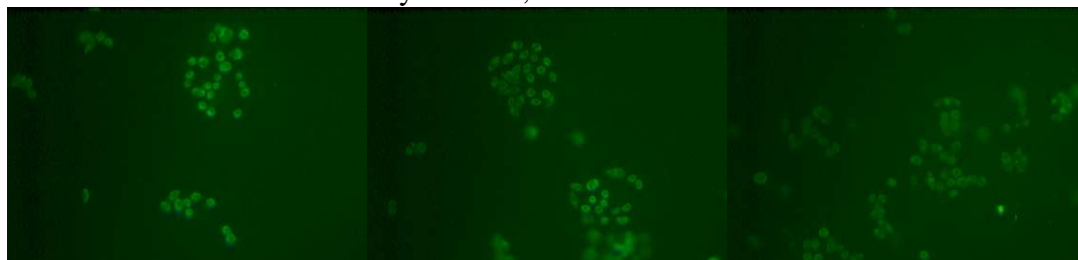

1 hr

2 hr

3 hr

100  $\mu$ M **11**, 10 mM Aniline

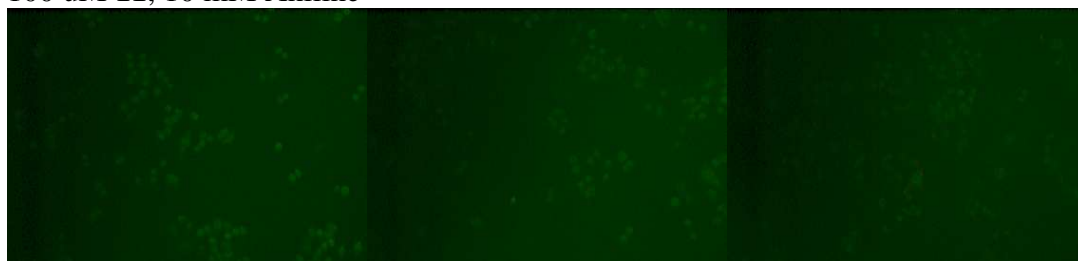

1 hr

2 hr

3 hr

**Figure S2:** Time course experiments of cellular quenching. HeLa cells were incubated with 10  $\mu$ M 7-diethylamino-3-formylcoumarin for 1 hour, then with dabcyI or quencher **11** and 10 mM aniline for 1, 2 or 3 hours and imaged (excitation 400 – 400 nm, emission > 470 nm). Identical camera settings were used in all cases.

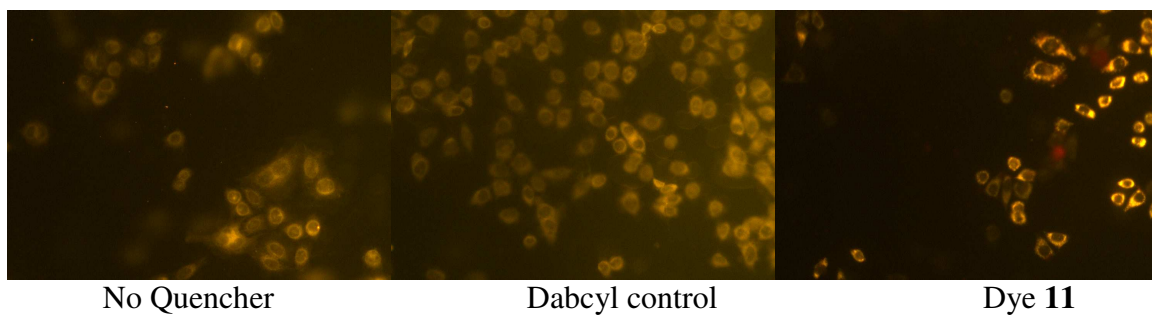

**Figure S3:** Cellular control experiments with rhodamine 6G (a non-aldehyde containing fluorophore). HeLa cells were incubated with 1  $\mu$ M rhodamine 6G for 1 hour, then with 100  $\mu$ M dabcyl or quencher **11** + 10 mM aniline for 3 hours, then imaged (excitation 450 – 490 nm, emission > 520 nm).

Fluorophore Only

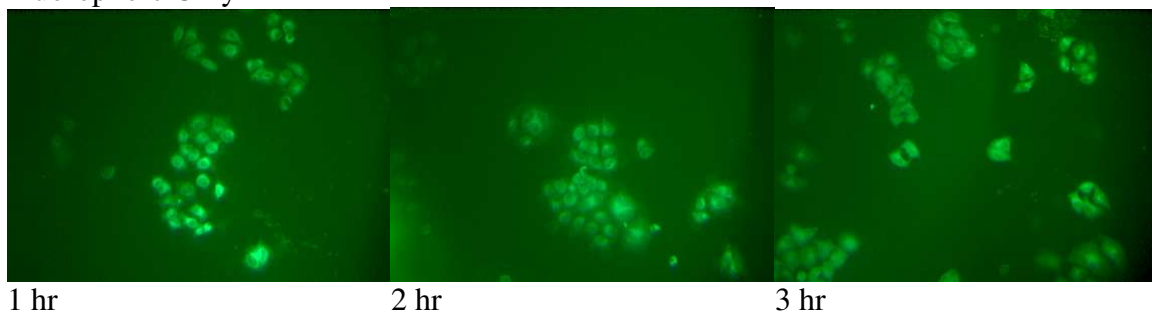

100  $\mu$ M **8**, No Aniline

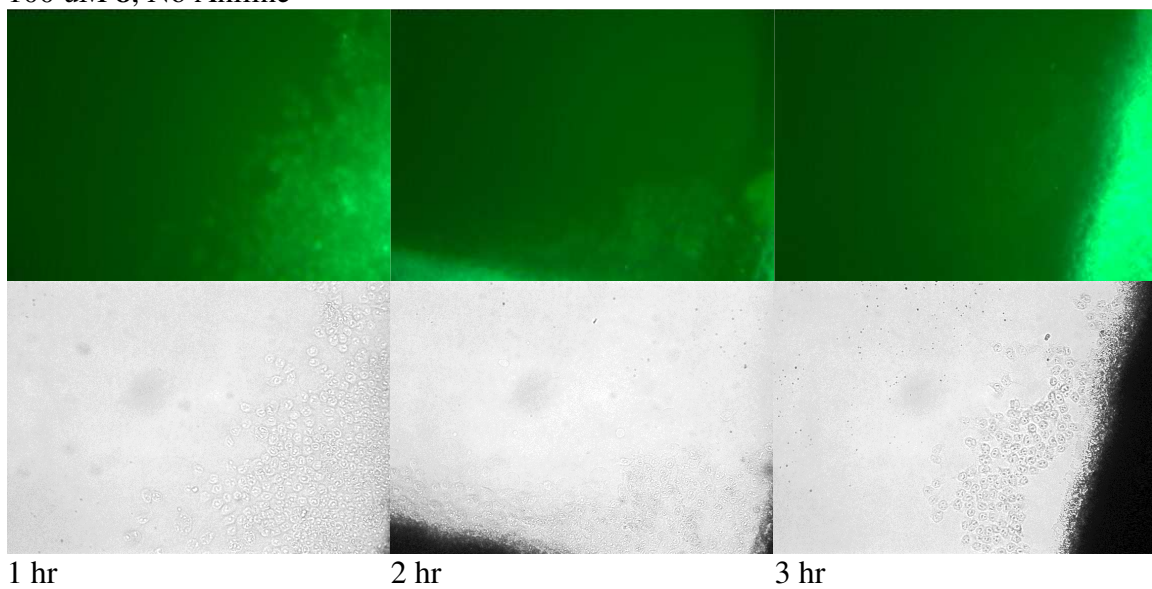

100  $\mu$ M **8**, 10 mM Aniline

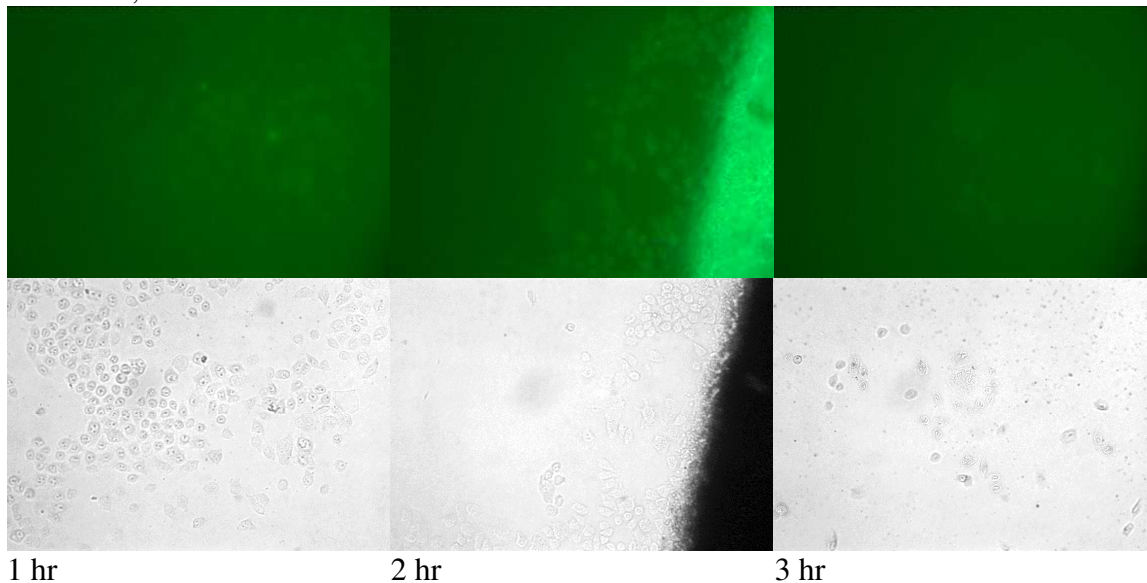

10 mM Aniline

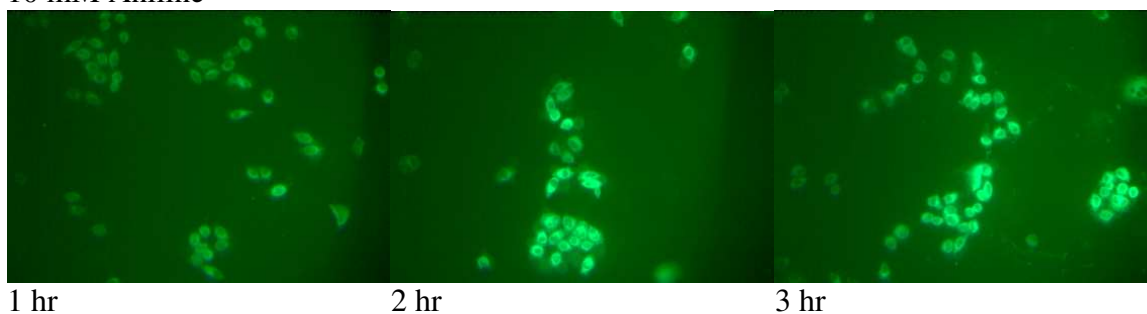

**Figure S4:** Time course of cellular quenching experiments. Cells were incubated with 10  $\mu$ M 7-diethylamino-3-formylcoumarin for 1 hour then with quencher **8**, 10 mM aniline or quencher **8** and 10 mM aniline for 1, 2 or 3 hours and imaged (excitation 400 – 400 nm, emission greater than 470 nm). Brightfield images for treatment of cells with quencher **8** are also provided, the same areas are shown in the fluorescence and brightfield images for comparison.

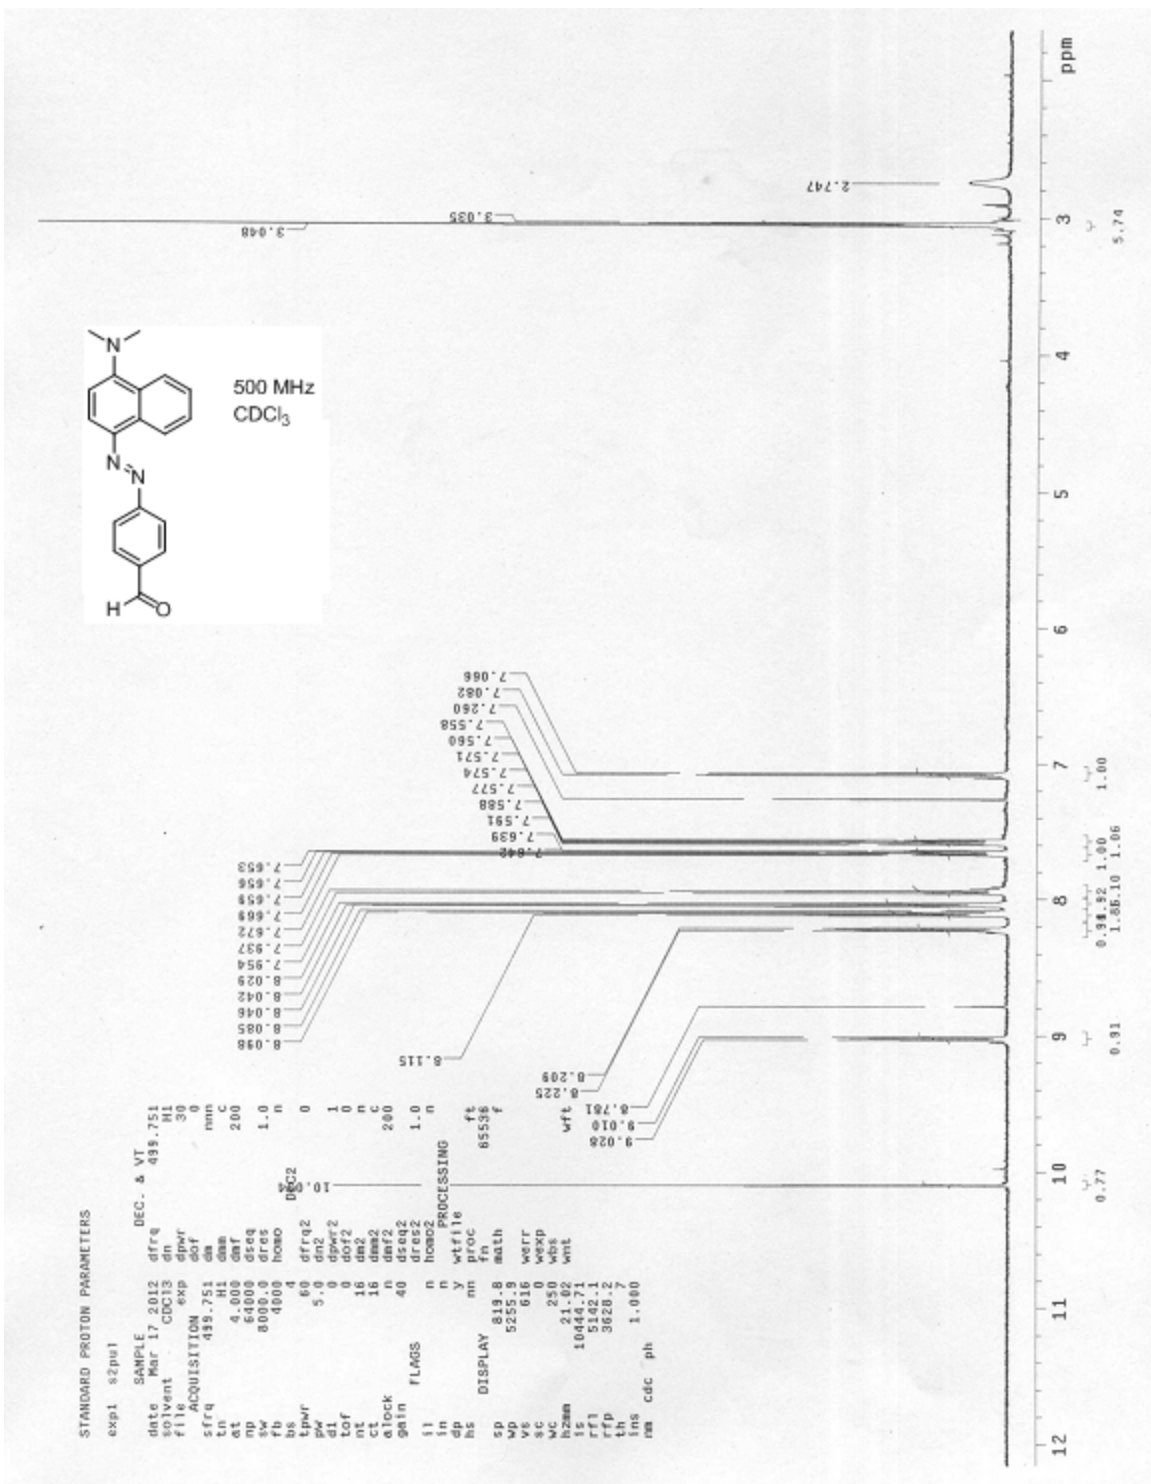







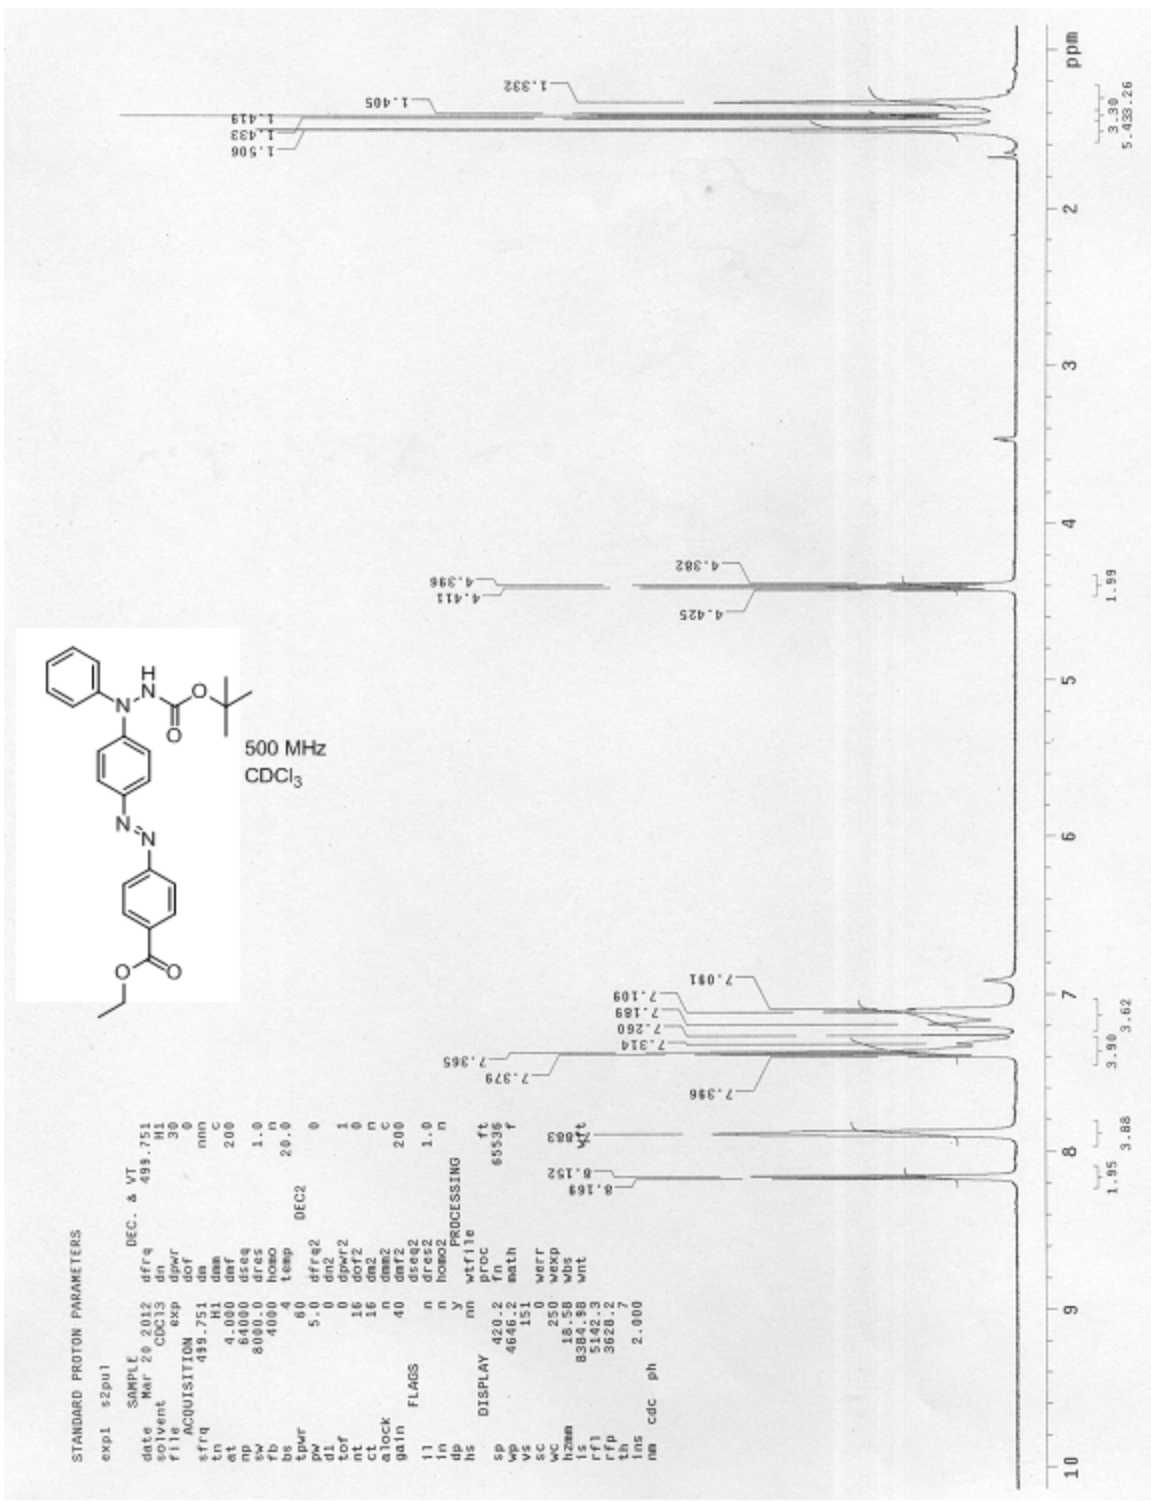

Proton NMR spectrum of 14



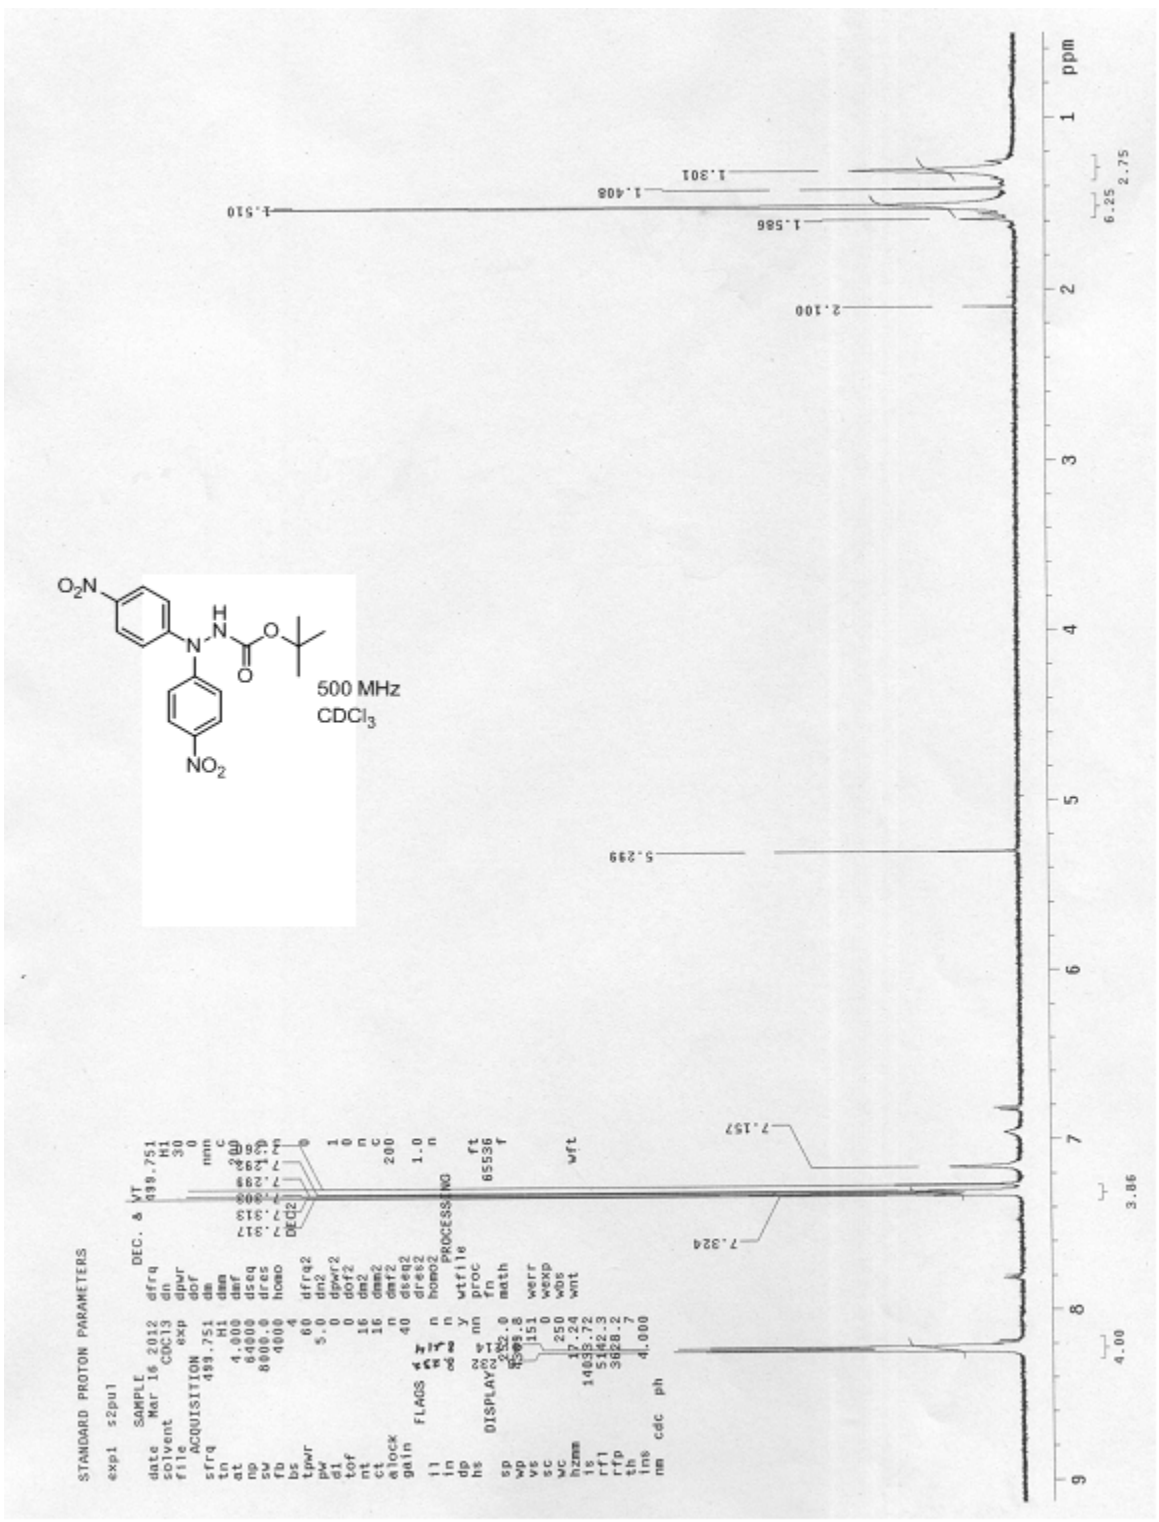

Proton NMR spectrum of **15**





Proton NMR spectrum of **18**

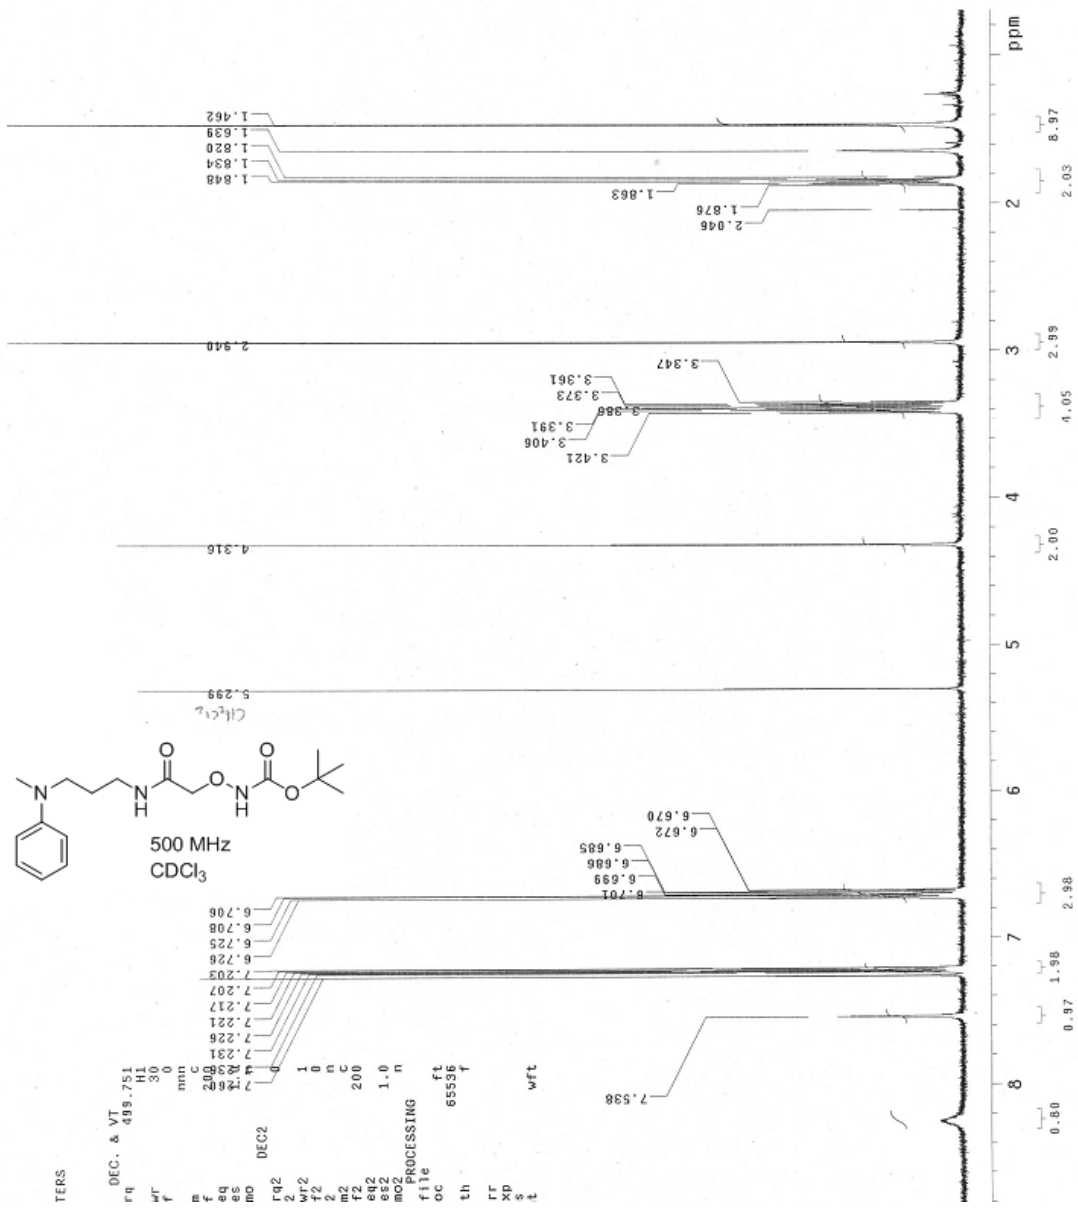

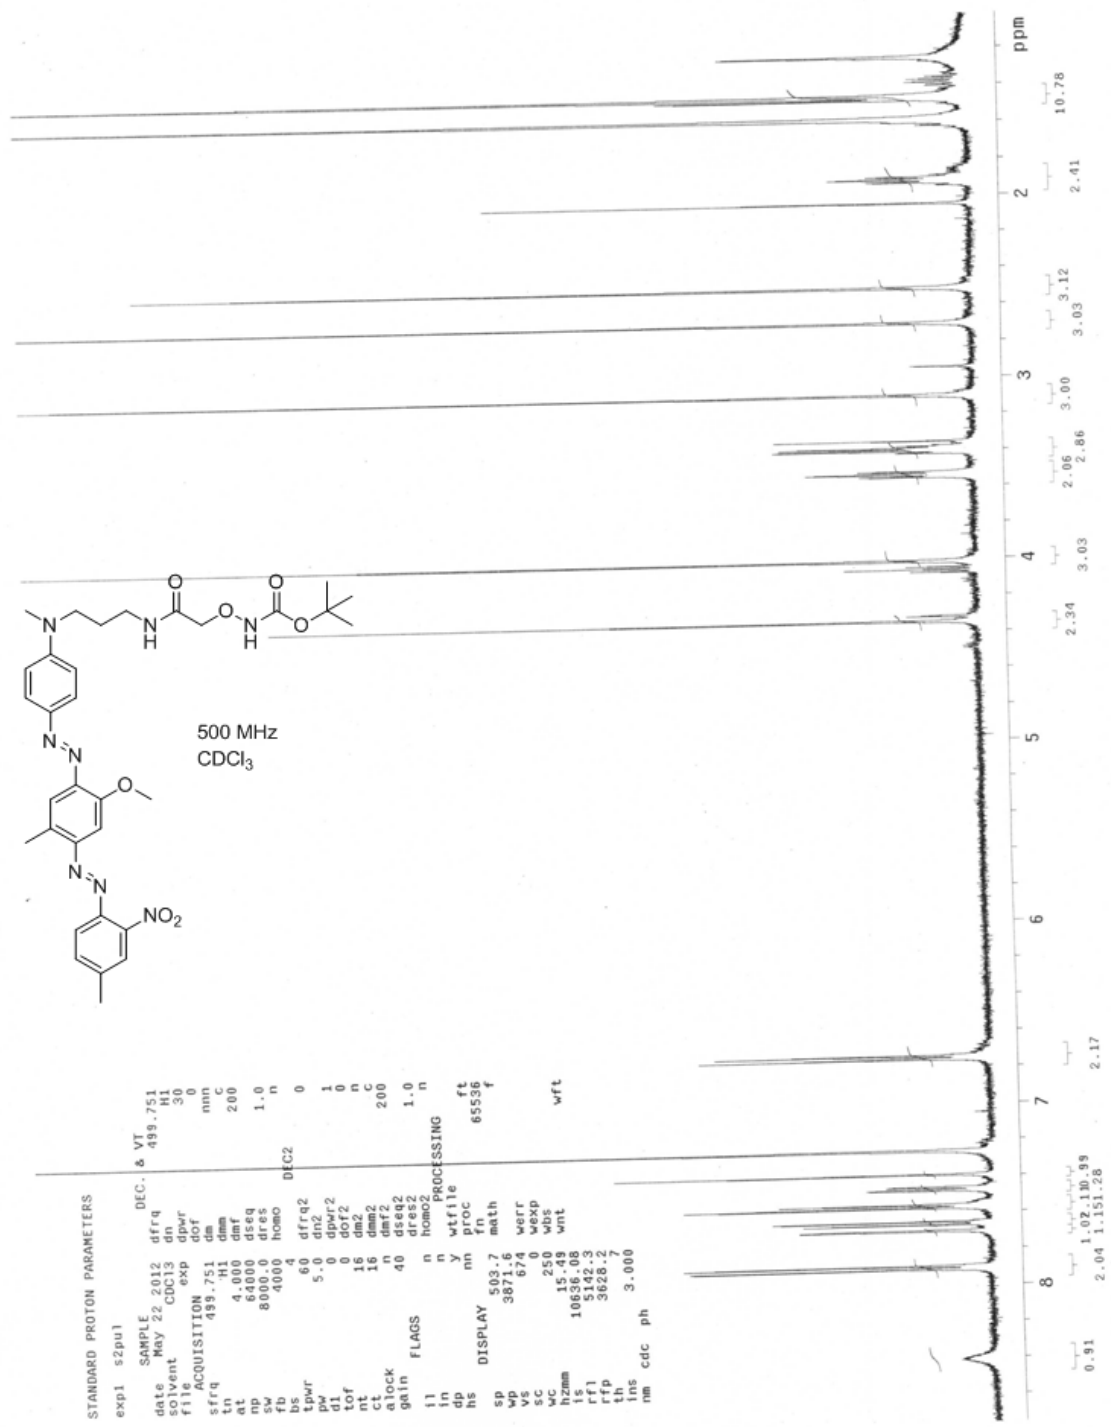

Proton NMR spectrum of **19**

Proton NMR spectrum of 20

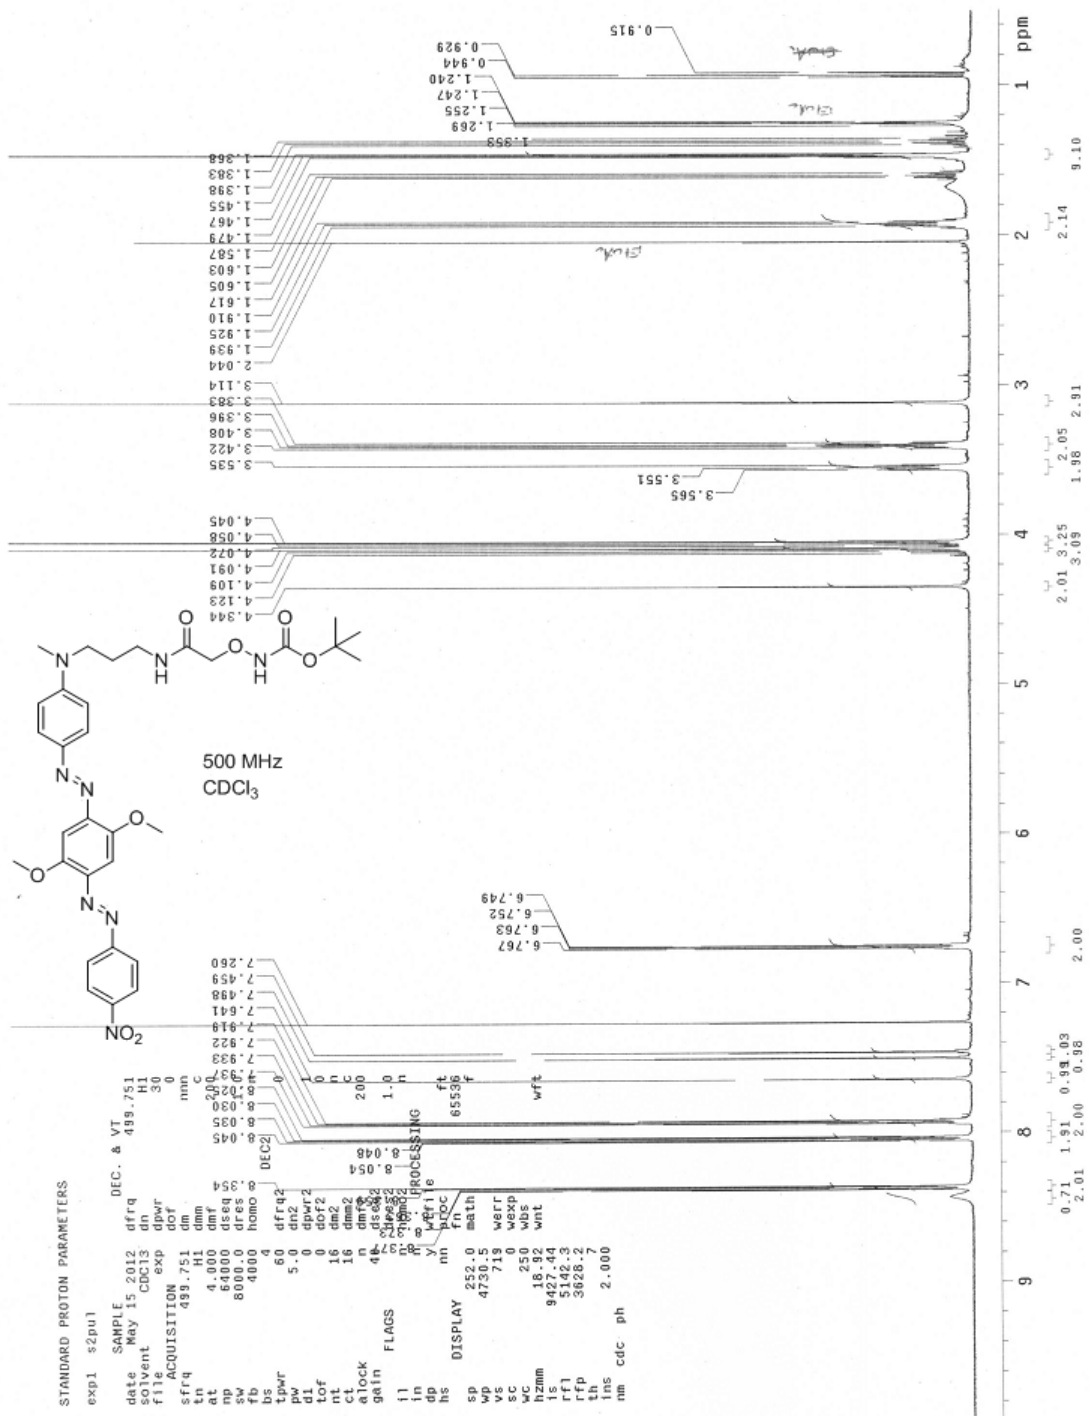

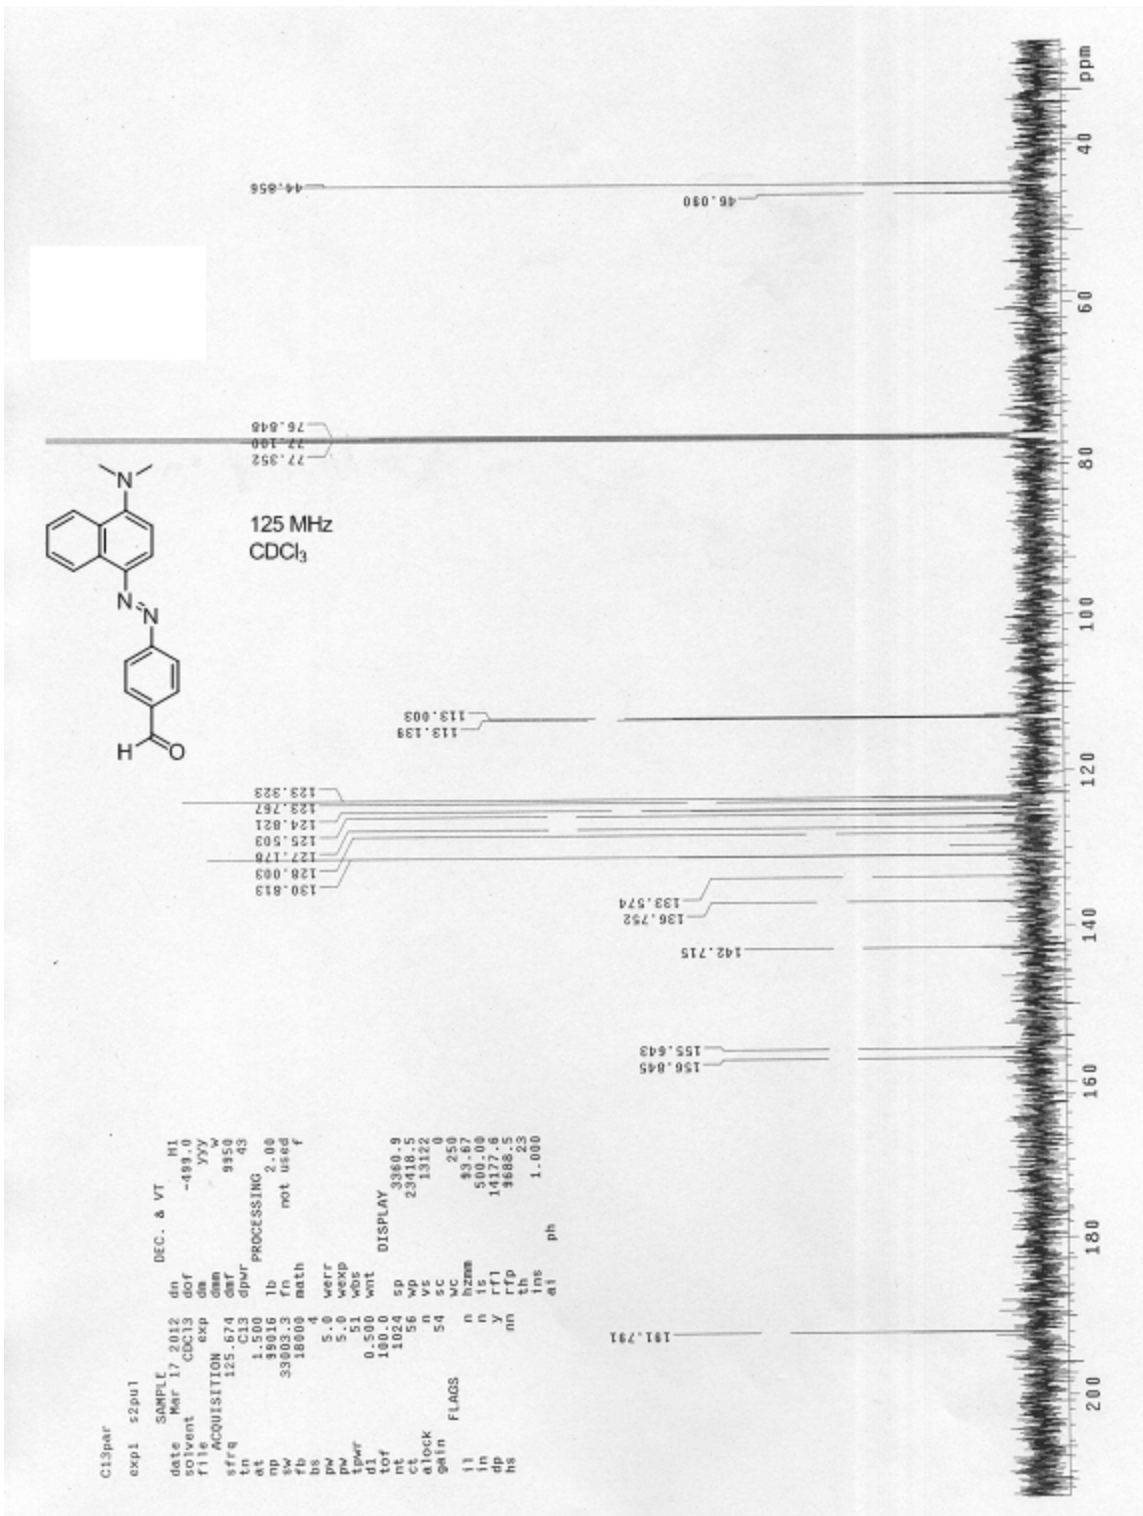

Carbon NMR spectrum of 2

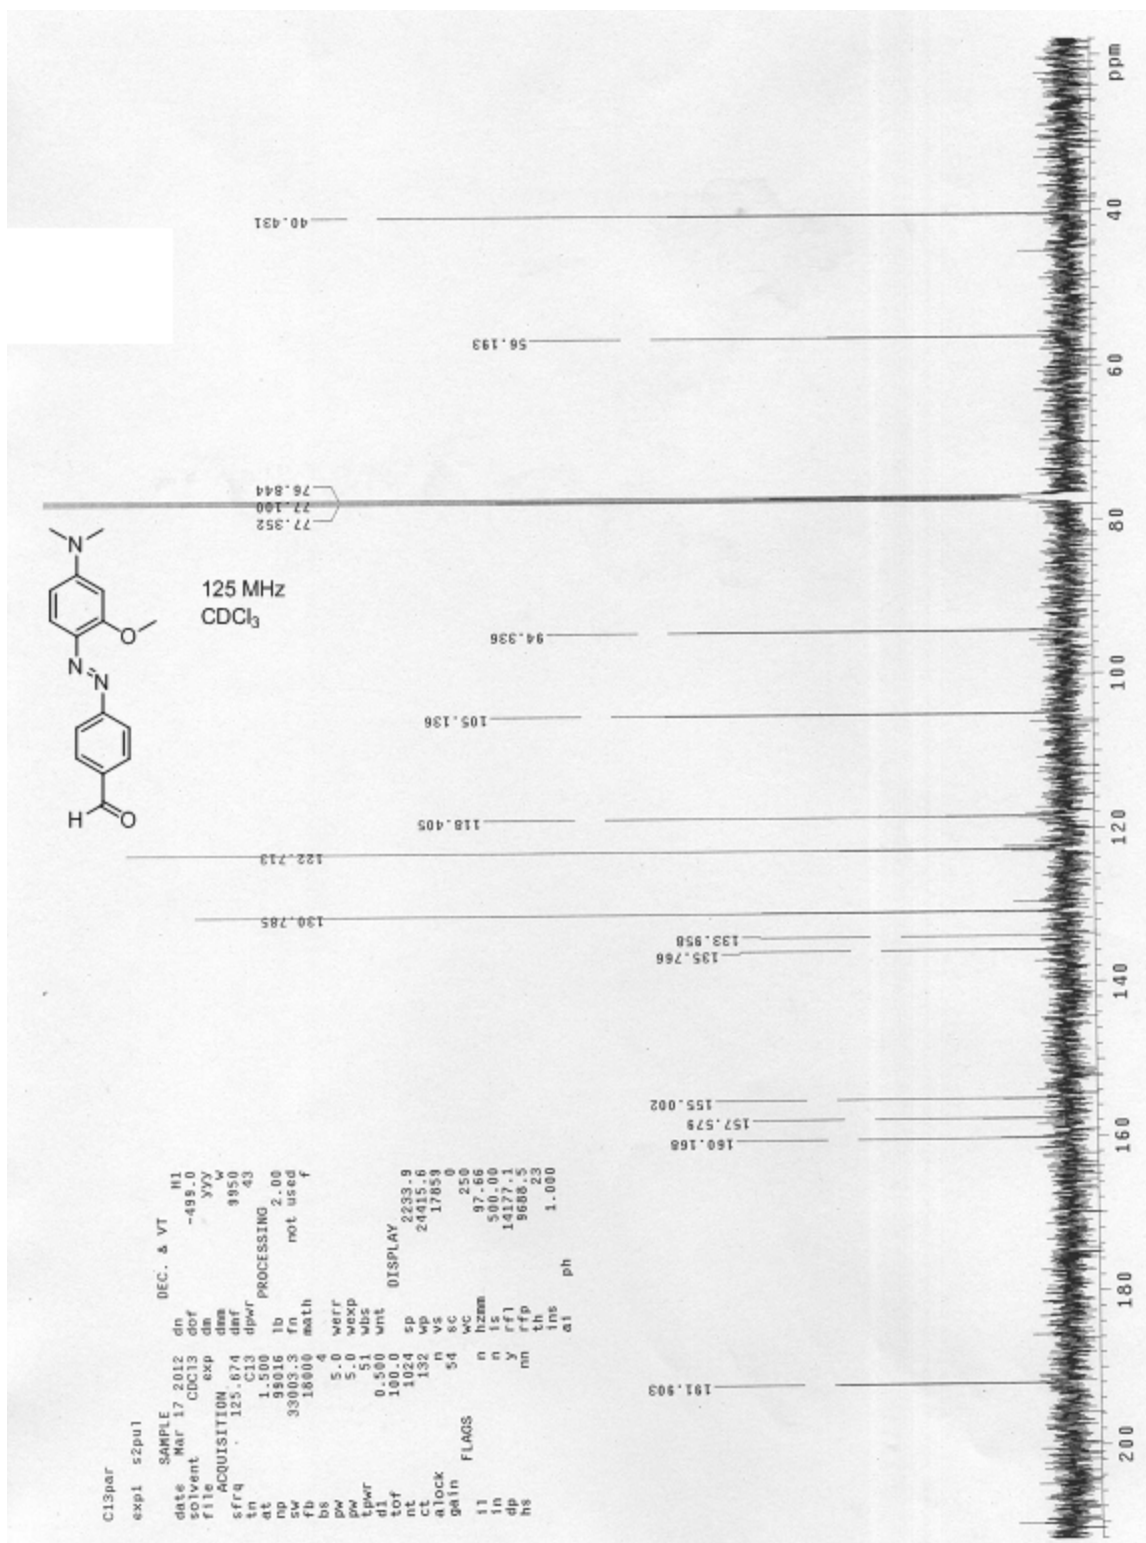

Carbon NMR spectrum of 3



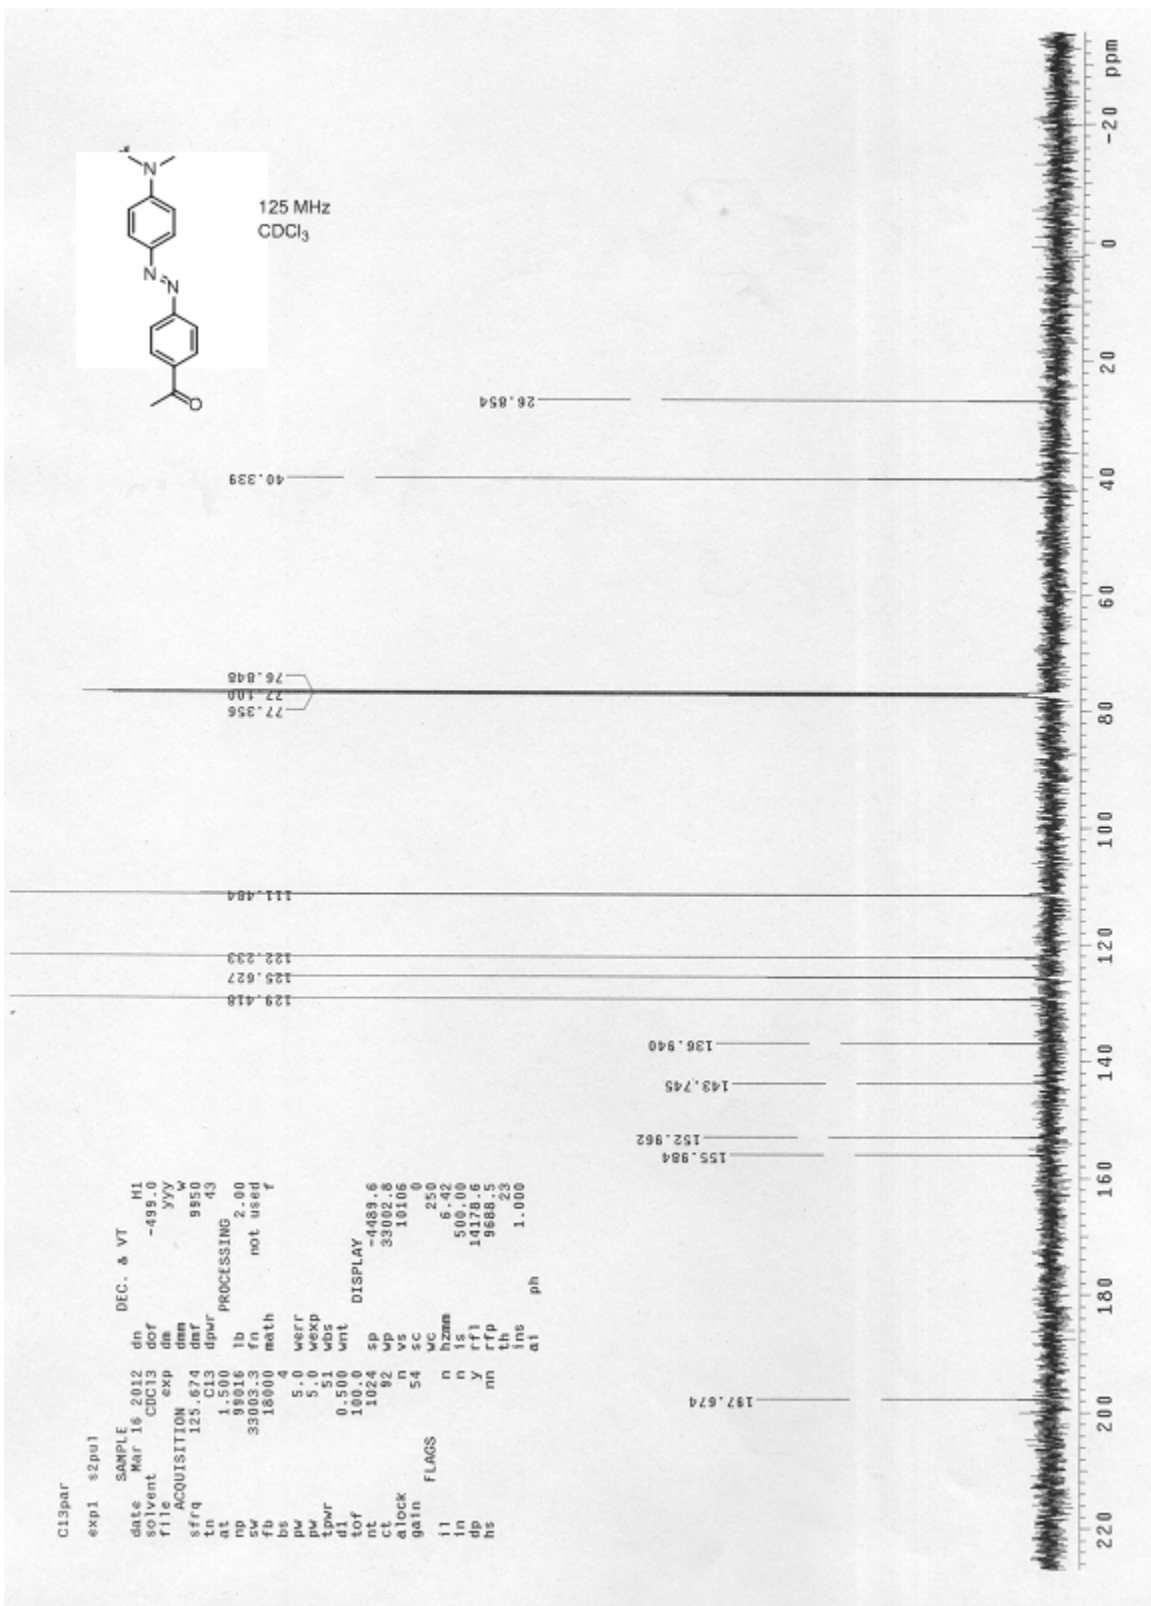

Carbon NMR spectrum of 4

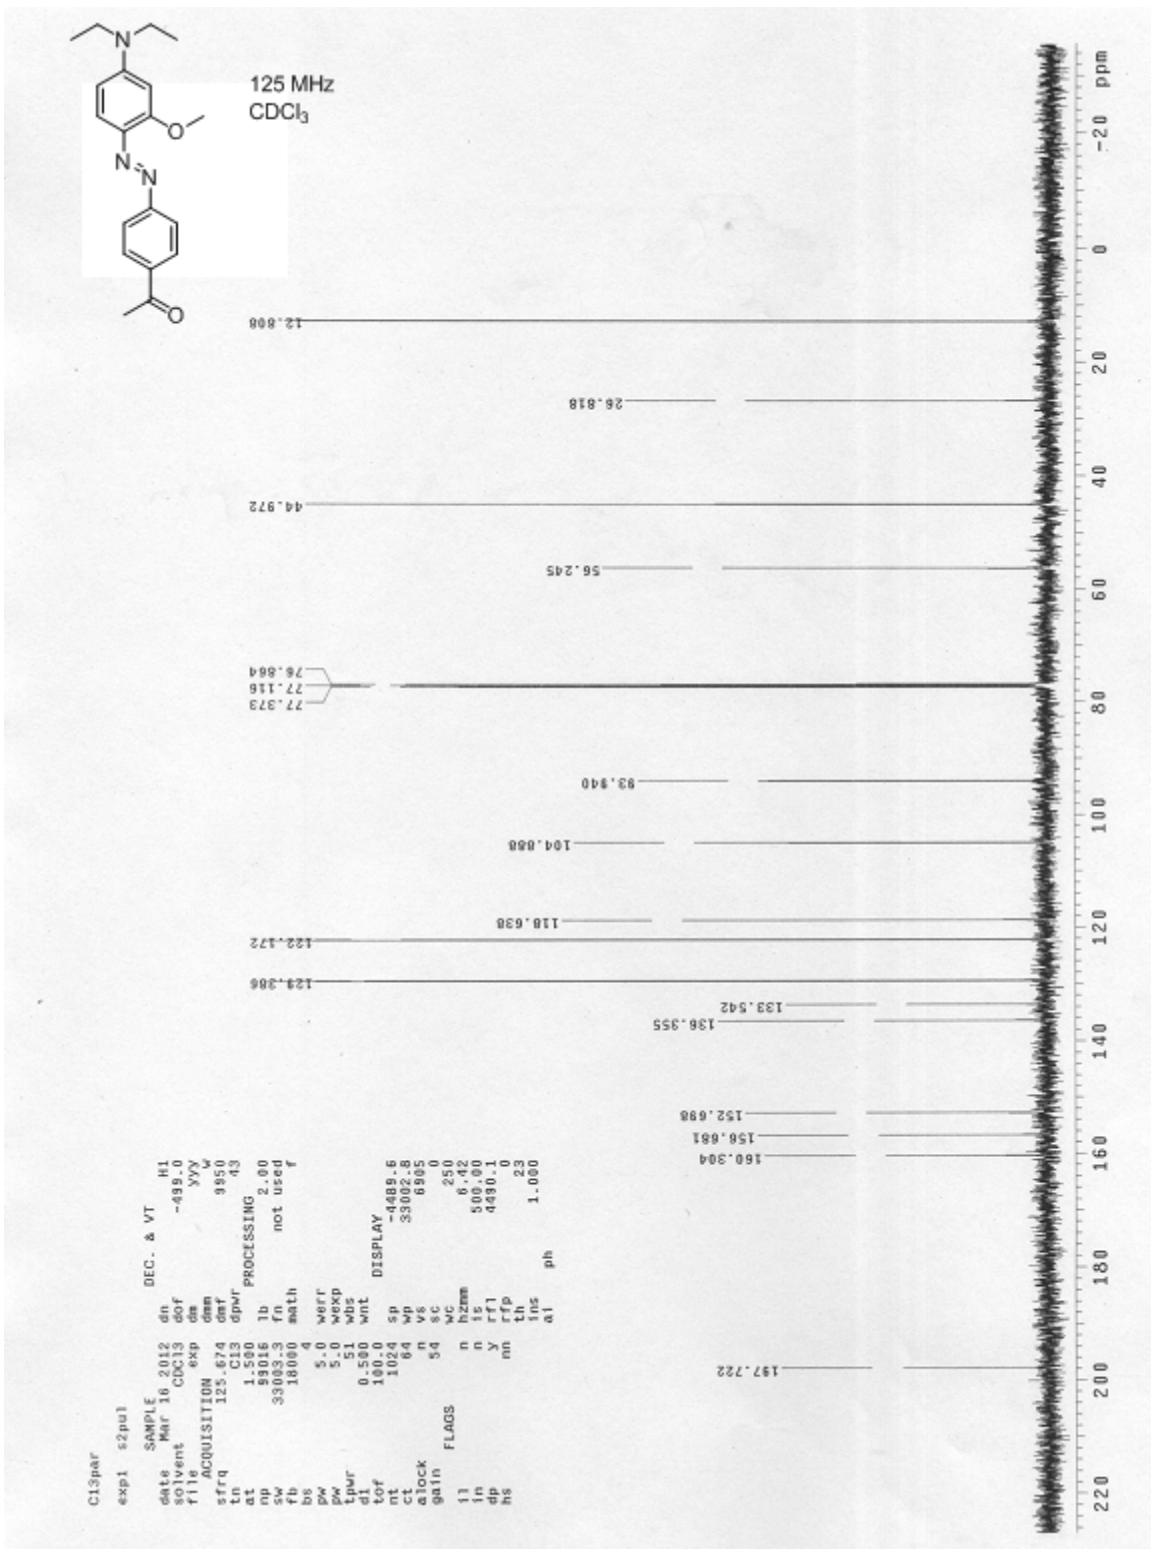

Carbon NMR spectrum of **5**

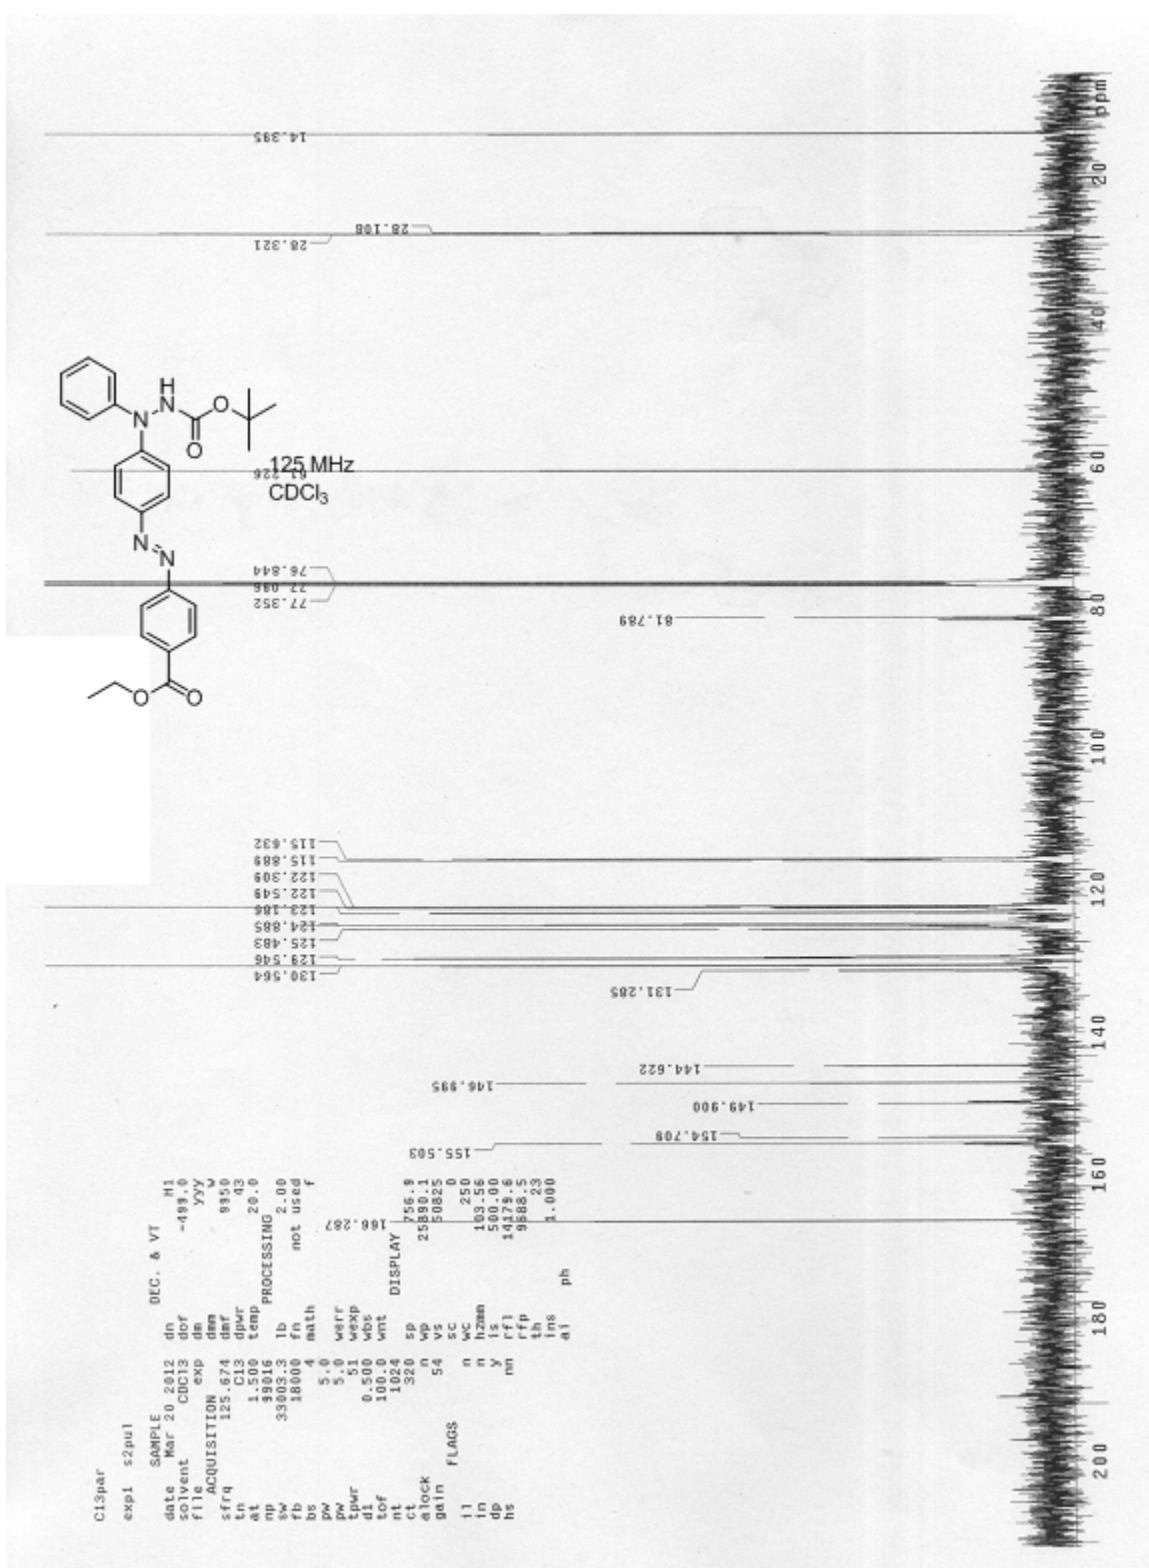

Carbon NMR spectrum of **14**

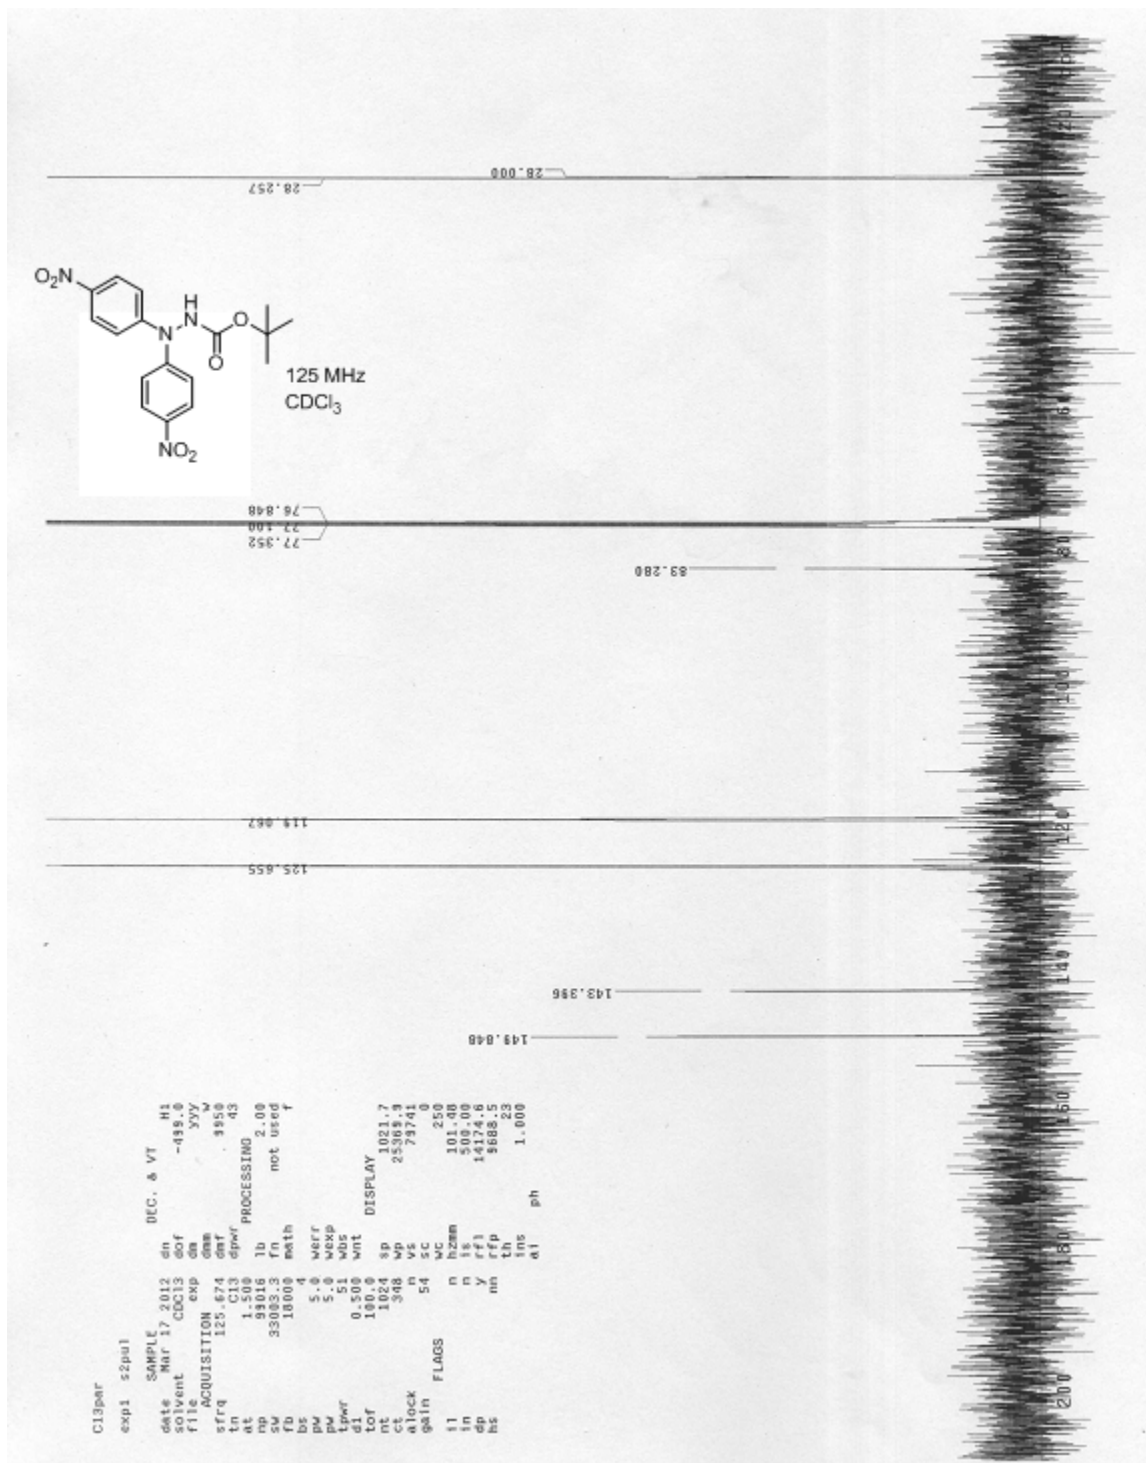

Carbon NMR spectrum of **15**

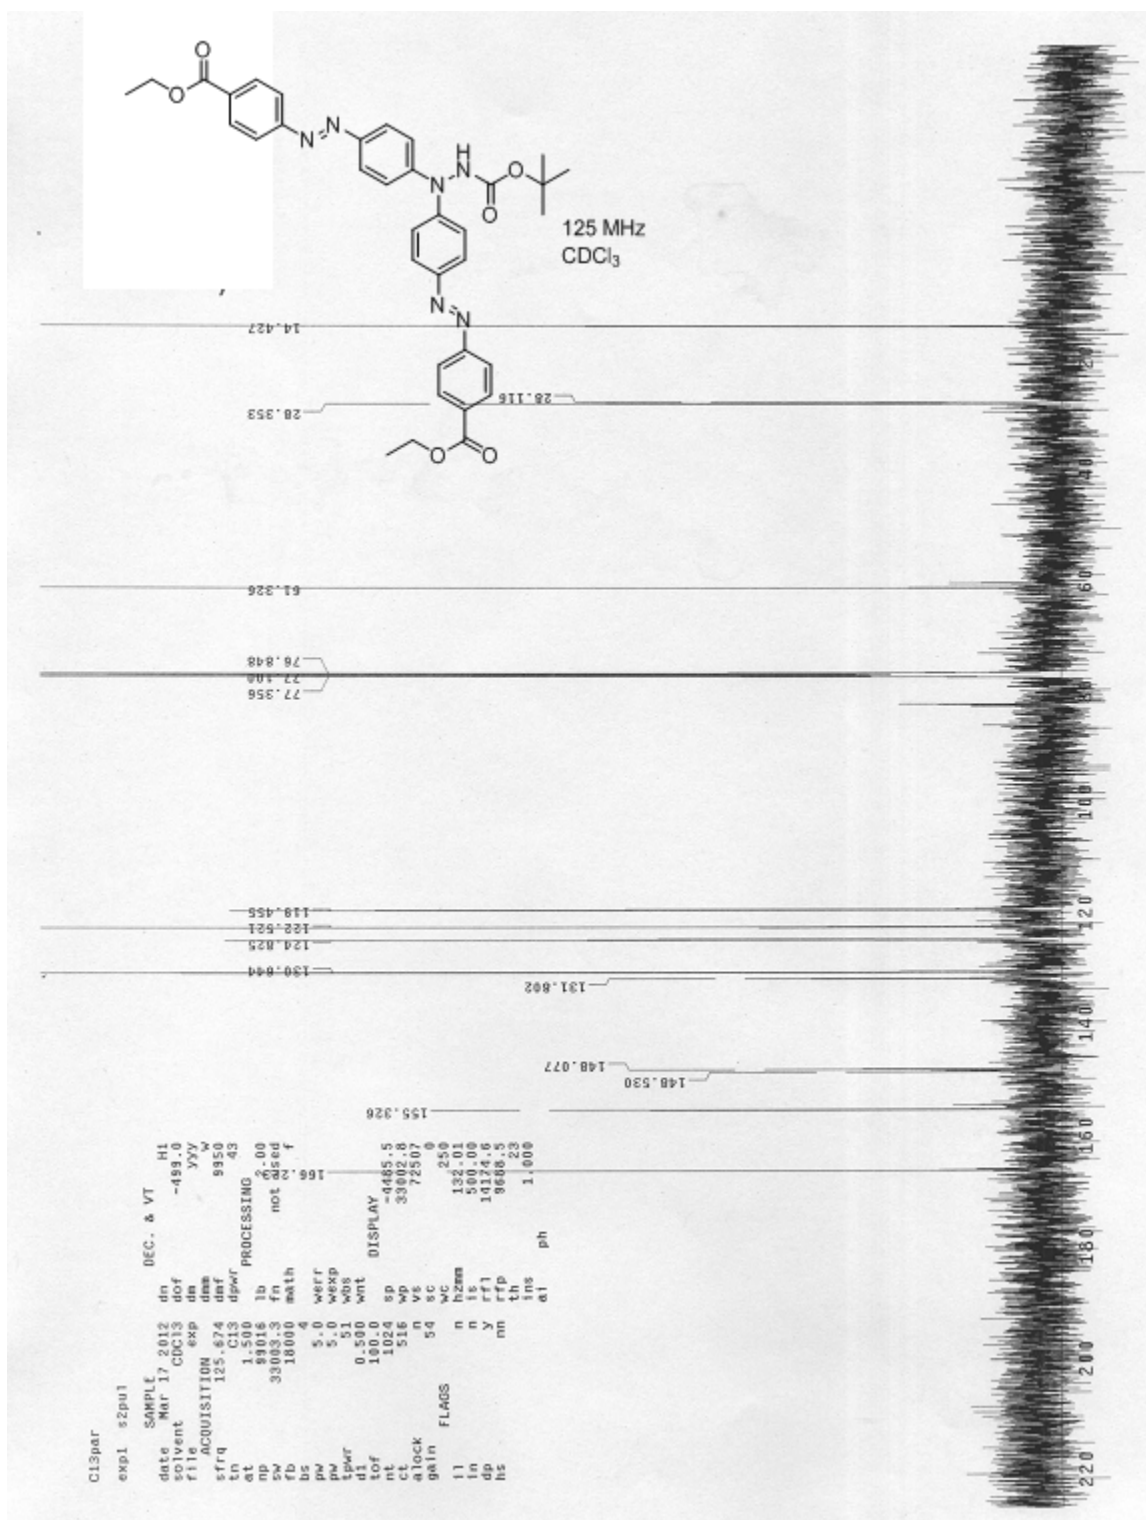

Carbon NMR spectrum of **16**

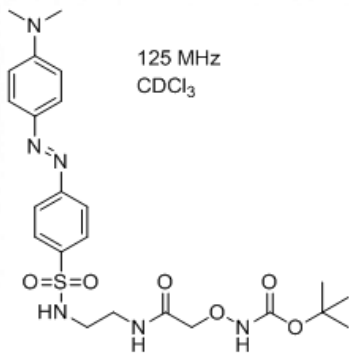

125 MHz  
CDCl<sub>3</sub>

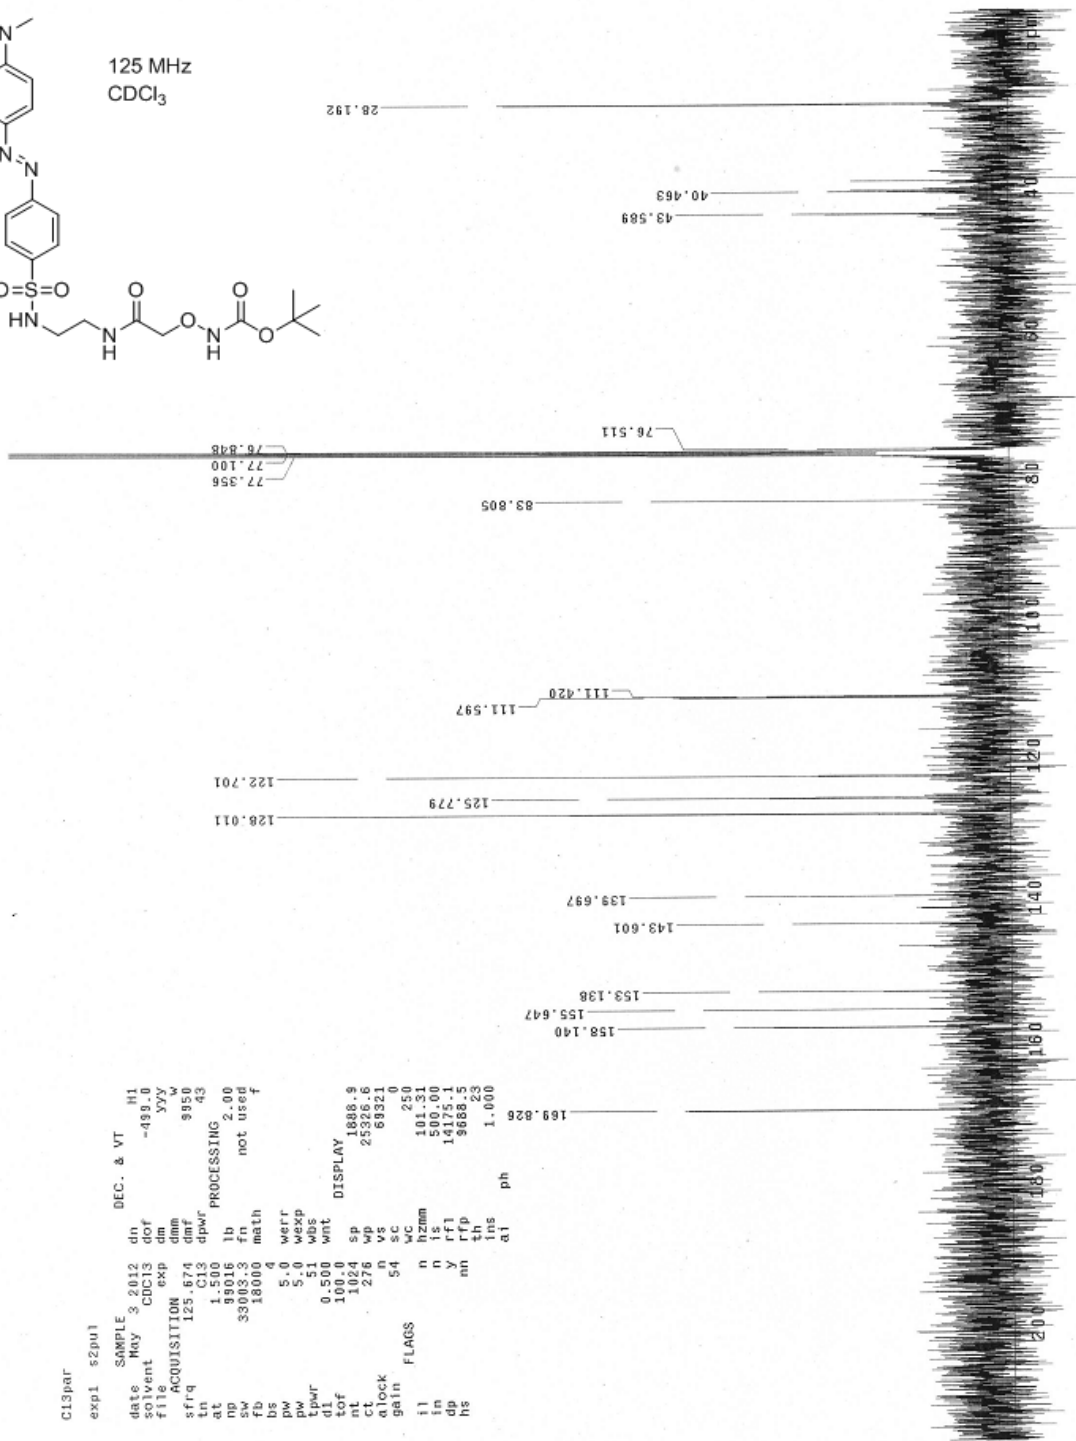

Carbon NMR spectrum of 17

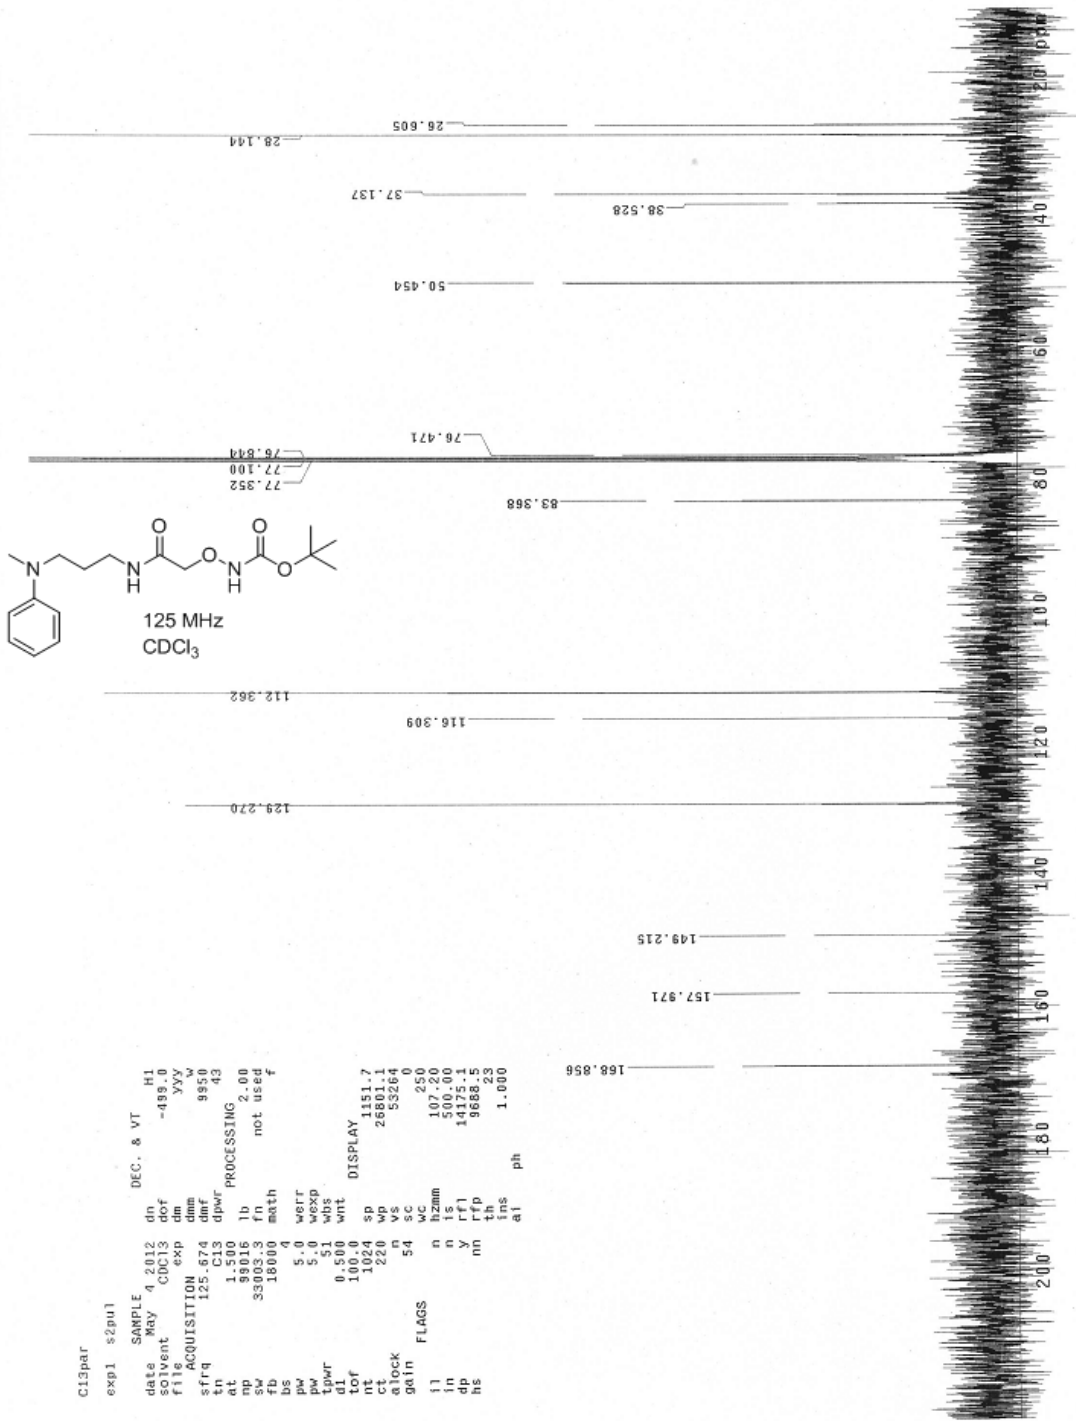

Carbon NMR spectrum of **18**

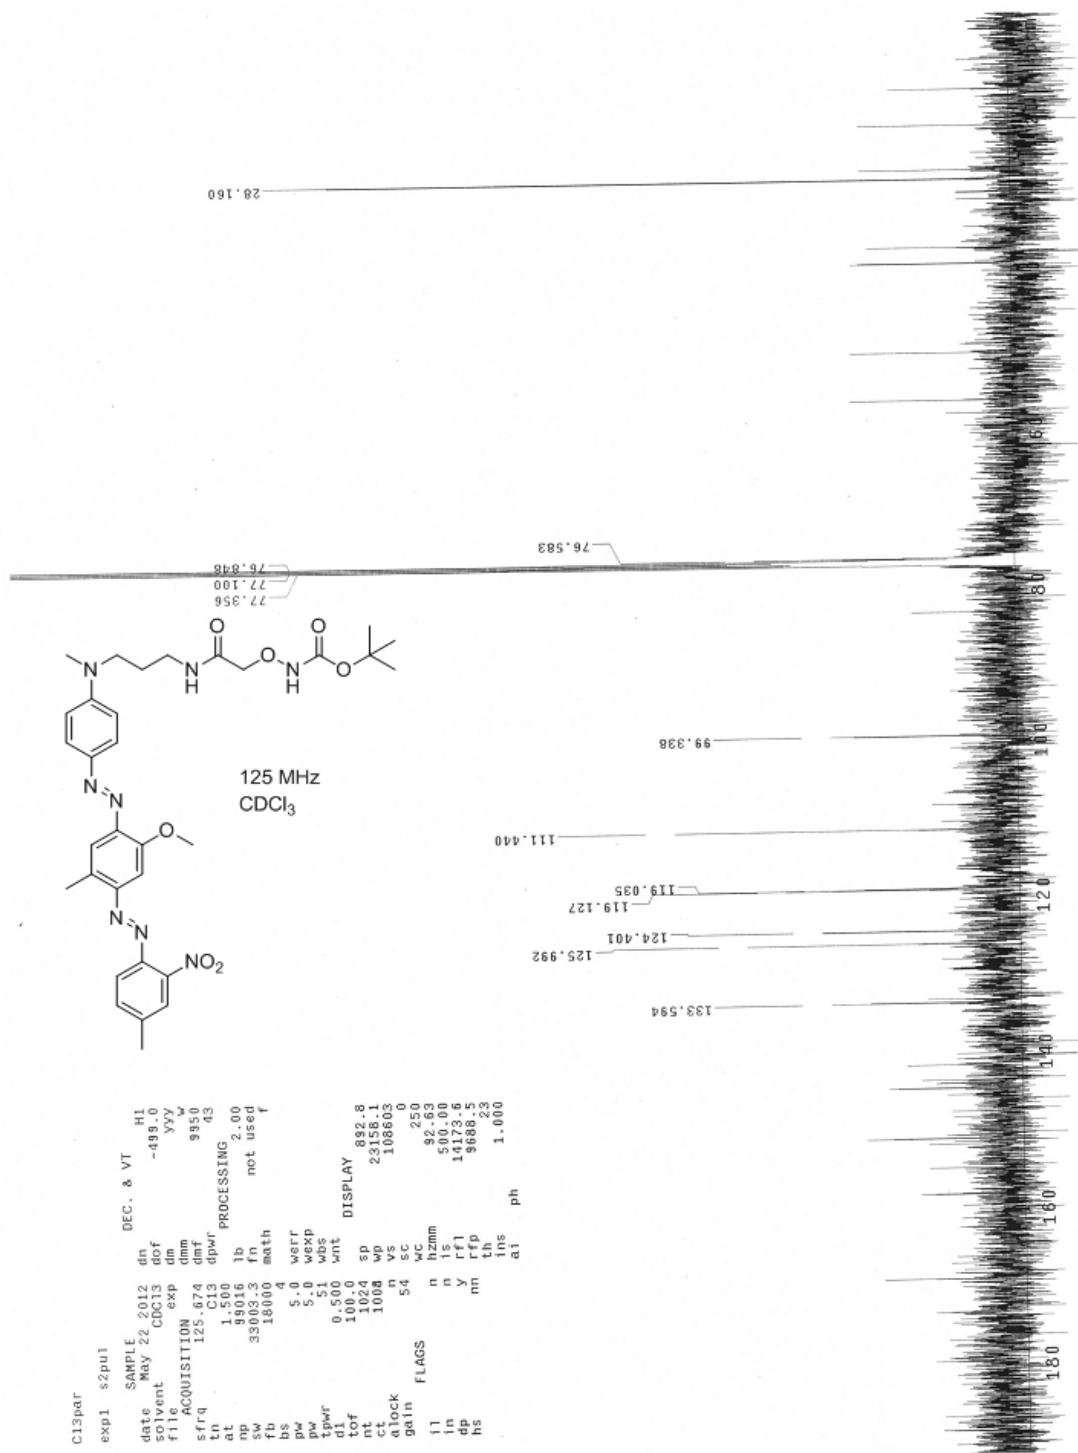

Carbon NMR spectrum of **19**



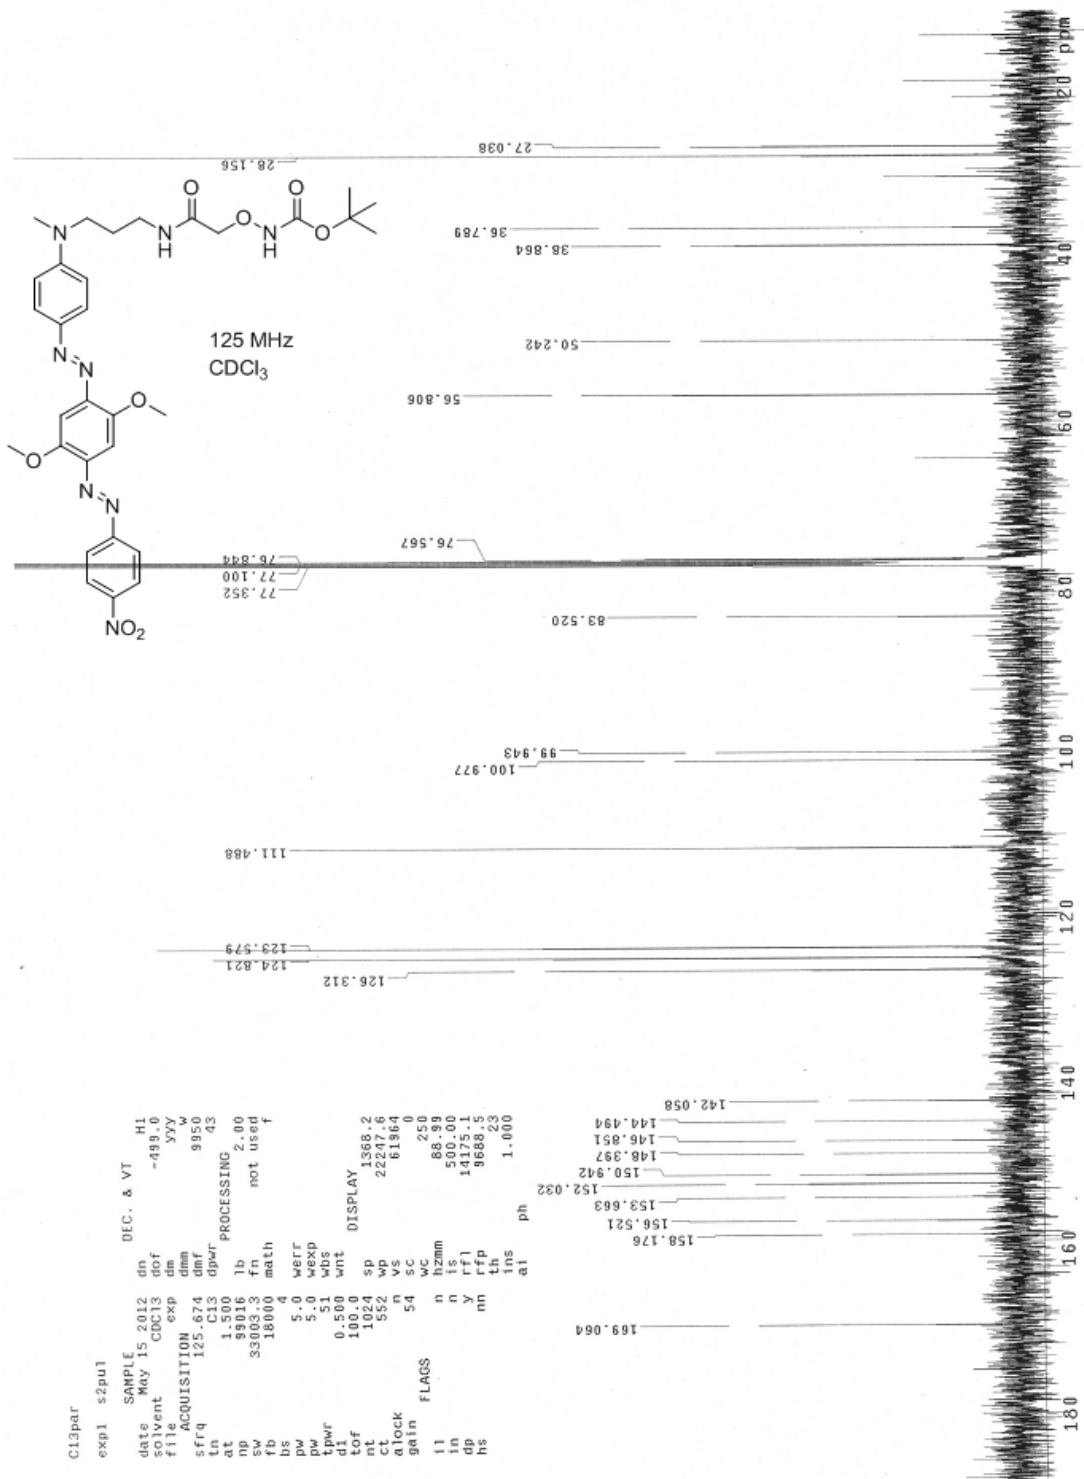

Carbon NMR spectrum of 20
